1 **Title**

2 An interpretable flux-based machine learning model of drug interactions across metabolic  
3 space and time

4 **Authors**

5 Carolina H. Chung,<sup>1</sup> Sriram Chandrasekaran<sup>1-4\*</sup>

6 **Affiliations**

7 <sup>1</sup>Department of Biomedical Engineering, University of Michigan, Ann Arbor, MI, 48109,  
8 USA.

9 <sup>2</sup>Program in Chemical Biology, University of Michigan, Ann Arbor, MI, 48109, USA.

10 <sup>3</sup>Center for Bioinformatics and Computational Medicine, Ann Arbor, MI, 48109, USA.

11 <sup>4</sup>Rogel Cancer Center, University of Michigan Medical School, Ann Arbor, MI, 48109,  
12 USA.

13 \*Corresponding author: [csriram@umich.edu](mailto:csriram@umich.edu)

14 **Abstract**

15 Drug combinations are a promising strategy to counter antibiotic resistance. However,  
16 current experimental and computational approaches do not account for the entire complexity  
17 involved in combination therapy design, such as the effect of the growth environment, drug  
18 order, and time interval. To address these limitations, we present an approach that uses  
19 genome-scale metabolic modeling and machine learning to explain and guide combination  
20 therapy design. Our approach (a) accommodates diverse data types, (b) accurately predicts  
21 drug interactions in various growth conditions, (c) accounts for time- and order-specific  
22 interactions, and (d) identifies mechanistic factors driving drug interactions. The entropy in  
23 bacterial stress response, time between treatments, and gluconeogenesis activation were the  
24 most predictive features of combination therapy outcomes across time scales and growth  
25 conditions. Analysis of the vast landscape of condition-specific drug interactions revealed  
26 promising new drug combinations and a tradeoff in the efficacy between simultaneous and  
27 sequential combination therapies.

## 28 Introduction

29 Antimicrobial resistance (AMR) occurs due to extended exposure to antibiotics, which  
30 allow bacteria to evolve and genetically adapt to promote their survival. These genetic  
31 changes culminate in the development of resistance mechanisms that render antibiotic  
32 treatments ineffective (1). In the context of AMR, bacterial metabolism plays a key role in  
33 promoting survival in new niches through adaptable use of nutrients in the local  
34 environment (2, 3). Bacterial metabolism also impacts susceptibility to treatment, such as  
35 through the production of reactive oxygen species (4, 5) or changes in membrane  
36 permeability (6). Of note, these metabolic responses are tied to entropy (i.e., disorder) in the  
37 bacterial stress response, which has been shown to be a generalizable predictor for antibiotic  
38 sensitivity (7). Altogether, these individual findings suggest that changes in bacterial  
39 metabolism in response to antibiotics may be insightful for the design of novel treatments  
40 that mitigate resistance.

41 Combination therapy, which involves the use of two or more therapeutics, holds great  
42 potential for combating resistant pathogens as it not only leverages already regulated  
43 therapeutics (8), but also offers room for improved efficacy (9). Further, combination  
44 therapy could be optimized to selectively target resistant pathogens via collateral sensitivity,  
45 which has been shown to overcome multidrug resistance in cancer (10, 11). Collateral  
46 sensitivity entails the increased sensitivity to a therapeutic that results from initial treatment  
47 with another stress agent (12). This phenomenon has been observed across various diseases  
48 and organisms (10, 13–15), and in context of AMR, could be leveraged to prevent and  
49 mitigate resistance (16). Combination therapies are traditionally identified using  
50 experimental methods; however, this approach quickly becomes infeasible when  
51 considering high-order combinations, the effects of the growth media, and time-/order-  
52 dependence for treatment efficacy.

53 With the advent of high-throughput omics data and application of machine learning (ML),  
54 it is now possible to expedite the search for effective combination therapies. ML has also  
55 been applied to reveal mechanistic insights into antibiotic mechanisms of action (17, 18)  
56 and identify novel antibacterial compounds (19, 20). In the past decade, several groups have  
57 used these methods to computationally design combination therapies in context of cancer  
58 (21–26) and AMR (27–29). For the latter case, prior models have been shown to generate  
59 predictions that accurately correspond to experimental and clinical efficacy against  
60 *Escherichia coli* and *Mycobacterium tuberculosis*, thus offering effective reduction of the  
61 search space for combination therapies against AMR (27, 29). However, these approaches  
62 are limited by the availability of omics data measuring the bacterial response to antibiotic  
63 treatment. The combined drug effect on bacterial growth has also only been assessed in a  
64 limited number of growth environments (28). Moreover, current models have primarily  
65 focused on simultaneous combinations; consequently, the potential of designing time- and  
66 order-dependent combination therapies that promote collateral sensitivity remains  
67 unexplored.

68 To address these limitations, we present an approach that integrates genome-scale metabolic  
69 models (GEMs) into ML model development to determine effective combination therapies.  
70 Using GEMs allows us to integrate diverse data types and account for different pathogen  
71 growth conditions. GEMs are computational models built from gene-protein-reaction  
72 associations of metabolic genes present in the genome of an organism (30). Additionally,  
73 they include annotation of traditional antibiotic targets such as cell wall synthesis, DNA

74 replication, and RNA transcription. Model constraints, such as from omics data or nutrient  
75 availability, can be imposed to simulate bacterial metabolism in response to different  
76 perturbations (31, 32). Our approach using GEMs and ML provides a systems-level  
77 perspective of the bacterial response to antibiotic treatment in condition-specific cases. This  
78 is critical for designing efficacious combination therapies, since experimentally measured  
79 susceptibility to antibiotics *in vitro* may not always translate into efficacy *in vivo*. We further  
80 extend our approach to predict outcomes for sequential combination therapies, which can  
81 be designed into cyclic antibiotic regimens that mitigate resistance (16). Finally, we  
82 showcase how our models reveal mechanistic insights that explain treatment potency and  
83 can be leveraged to finetune data-driven combination therapy design.

## 84 Results

### 85 ***CARAMEL is a hybrid GEM–ML approach that predicts combination therapy outcomes***

86 Our approach, called *Condition-specific Antibiotic Regimen Assessment using Mechanistic*  
87 *Learning (CARAMEL)*, involves a two-step modeling process: (a) simulating metabolic flux  
88 data using GEMs and (b) developing a ML model to predict combination therapy outcomes  
89 using flux from GEMs. For the first part, omics data and metabolite composition of the  
90 extracellular environment serve as GEM inputs to determine flux profiles in response to  
91 drug treatment and growth in defined media, respectively (**Fig. 1A**). For the second part,  
92 GEM-derived flux profiles and drug interaction data serve as inputs to train a ML model  
93 that predicts interaction outcomes for novel drug combinations (**Fig. 1B**). We developed  
94 ML models predictive of combination therapy outcomes for *E. coli* and *M. tb* using the  
95 Random Forests algorithm. We specifically chose this ML method as it can handle small  
96 datasets and determine feature importance, i.e., how much each feature contributes to the  
97 accuracy in model predictions. The feature importance can reveal mechanistic insights into  
98 the factors driving combination therapy outcomes.

99 We determined metabolic flux profiles in response to drug treatment and condition-specific  
100 growth by constraining the *E. coli* GEM iJO1366 (33) and the *M. tb* GEM iEK1011 (34).  
101 For drug flux profiles, we imposed chemogenomic data for *E. coli* (35) and transcriptomic  
102 data for *M. tb* (29) as GEM constraints. Briefly, chemogenomic data measures single-gene  
103 knockout (KO) fitness while transcriptomics data measures genome-wide expression of  
104 genes. By selecting genes for which there was differential fitness or expression in response  
105 to a specific treatment, we could infer a set of differentially regulated genes for individual  
106 drugs. For transcriptomic data, positive and negative differential expression directly  
107 corresponded with up- and down-regulation, respectively. For chemogenomic data, we  
108 surmised based on the cost-benefit gene expression model (36) that gene KOs resulting in  
109 low fitness were up-regulated while gene KOs that enhanced fitness (i.e., large benefit) were  
110 down-regulated. Direct comparison of flux profiles simulated from a chemogenomic-based  
111 approach against flux profiles simulated with transcriptomics and proteomics data  
112 confirmed that these assumptions were valid (**Fig. S1**) (37–39). To determine growth media  
113 flux profiles, the availability of metabolites within a media condition was used to constrain  
114 the GEMs. Specifically, we modified the uptake rate for exchange reactions providing key  
115 metabolites (e.g., glycerol exchange for M9 glycerol media) to allow cellular intake (see  
116 **Methods** for further details).

117 Prior to ML model development, we processed drug and media flux profiles to determine  
118 joint profiles for all combinations of interest. Joint profiles were comprised of four pieces  
119 of information: (a) the combined effect of all treatments (i.e., sigma scores), (b) the unique

120 effect of individual treatments (i.e., delta scores), (c) the overall metabolic entropy (i.e.,  
121 entropy scores), and (d) time interval (relevant for time- and order-dependent  
122 combinations). To determine sigma and delta scores, we adapted a strategy previously used  
123 for creating joint chemogenomic profiles (27, 28). Specifically, we binarized drug and  
124 media flux profiles based on differential flux activity in comparison to baseline (i.e., GEM  
125 simulation without additional constraints). Sigma scores were defined as the union of  
126 binarized flux profiles for all treatments involved in a combination. Delta scores for  
127 simultaneous interactions were defined as the symmetric difference between flux profiles,  
128 while delta scores for sequential interactions were determined based on the treatment  
129 sequence for a combination (see **Methods** for details). To account for metabolic entropy, we  
130 first calculated entropy as defined by Zhu *et al.* (7) for each drug and media flux profile.  
131 We then defined entropy scores as the mean and sum of entropy among all treatments  
132 involved in a combination. Finally, the time feature was defined as the time interval between  
133 the first and last treatments for a combination (see **Methods** and **Fig. S2** for further details).

134 Using feature (i.e., joint profiles) and outcome (i.e., interaction scores, IS) information for  
135 a set of drug combinations, we trained ML models to associate feature patterns to drug  
136 combination outcomes. Next, we used the trained ML models to predict outcomes for new  
137 drug combinations based on their feature information alone. We then compared our  
138 predictions against experimental data by calculating the Spearman correlation. We also  
139 assessed model performance by calculating the area under the receiver operating curve  
140 (AUROC) for both synergy and antagonism. High and positive values for both metrics  
141 indicate that model predictions correspond well with actual drug interaction outcomes.

### 142 ***CARAMeL predicts drug combination efficacy against *E. coli* and *M. tb* with high*** 143 ***accuracy***

144 We benchmarked CARAMeL against previous approaches by directly comparing our  
145 prediction accuracy against those reported in literature and those re-calculated using omics  
146 data directly instead of using fluxes. For these comparisons, we trained ML models and  
147 evaluated their performance for five different cases:

- 148 1. Predicting novel pairwise drug interaction outcomes for *E. coli* (27)
- 149 2. Predicting novel three-way drug interaction outcomes for *E. coli* (28)
- 150 3. Predicting pairwise drug interaction outcomes for *E. coli* cultured in a novel nutrient  
151 condition (M9 glycerol media) (28)
- 152 4. Predicting novel pairwise and three-way interaction outcomes for *M. tb* (29)
- 153 5. Predicting interaction outcomes for pairwise to five-way TB regimens used in clinical  
154 trials (40)

155 Of note, the first, second, and fourth cases tested the model's ability to predict unseen  
156 combinations involving test drugs with new mechanisms of action. The third case assessed  
157 whether the model could predict drug interaction outcomes in a new growth environment,  
158 while the fifth case ascertained if predicted outcomes corresponded with clinical efficacy.  
159 **Fig. 2** summarizes our findings for all analyses listed above. For all these studies, the same  
160 train-test datasets were used for evaluating CARAMeL against the original methods to  
161 ensure direct comparison. The same thresholds for synergy and antagonism defined in the  
162 original studies were also used in all these comparisons. Further discussion on ML model  
163 development and results, including the specific train-test allocation of interaction data  
164 reported in literature for each case, is provided below.

165 For case 1, we used drug interaction data previously measured for 171 pairwise  
166 combinations involving 19 drugs that cover a diverse set of targets (27) (**Table S1**). Out of  
167 this total, 105 interactions involving 15 drugs were used for model training and the  
168 remaining 66 interactions, which involved four new drugs that introduced new mechanisms  
169 of action (e.g., RNA synthesis), were used for model validation. The CARAMeL model  
170 yielded significant correlations between experimental and predicted scores ( $R = 0.65$ ,  $p \sim$   
171  $10^{-9}$ , **Fig. S3A**). Model predictions also yielded high AUROC values for classifying synergy  
172 ( $IS < -0.5$ , AUROC = 0.75) and antagonism ( $IS > 2$ , AUROC = 0.82) (**Fig. S3B**) based on  
173 thresholds defined in the original study. Of note, these results were considerably better than  
174 those reported in literature ( $R = 0.52$ ) (27) and were comparable to the omic-based approach  
175 ( $R = 0.63$ ) (**Fig. 2A**).

176 For case 2, we re-trained the CARAMeL model using 171 pairwise interactions to predict  
177 56 three-way combinations involving eight antibiotics (28) (**Table S1**). Our model generated  
178 accurate predictions ( $R = 0.63$ ,  $p \sim 10^{-7}$ , **Fig. S3C**) and notably identified synergistic  
179 interactions ( $IS < -0.2$ , AUROC = 0.95, **Fig. S3D**) with higher accuracy than the omics-  
180 based approach (AUROC = 0.76, **Fig. 2B**).

181 For case 3, the CARAMeL model was once again re-trained with the 171 pairwise  
182 interactions and additional pairwise data measured for *E. coli* cultured in M9 glucose and  
183 lysogeny broth (LB) media. We then applied our model to predict 55 pairwise interaction  
184 outcomes for *E. coli* cultured in M9 glycerol media. Our model yielded results comparable  
185 to those from literature (28) and re-determined using omics data across all three  
186 performance measures (**Figs. 2, S3E, and S3F**).

187 For case 4, we trained a CARAMeL model using combination data for *M. tb* treated with  
188 196 pairwise to five-way interactions involving 40 drugs (29) (**Table S2**). We then used data  
189 for 36 unseen interactions for model validation. The CARAMeL model yielded predictions  
190 that significantly correlated with experimental data ( $R = 0.57$ ,  $p \sim 10^{-4}$ , **Fig. S4A**) and  
191 performed well in classifying synergistic ( $IS < 0.9$ , AUROC = 0.82) and antagonistic ( $IS >$   
192  $1.1$ , AUROC = 0.84) interactions (**Fig. S4B**). Though the CARAMeL-based correlation is  
193 slightly lower than that reported in literature (29) ( $R = 0.63$ ), our model classified both  
194 synergistic and antagonistic interactions with high accuracies that are comparable to a model  
195 trained on omics data (**Fig. 2B**).

196 For case 5, we used the same CARAMeL model from case 4 to predict interaction outcomes  
197 for 57 multi-drug TB regimens involving nine drugs prescribed in separate clinical trials  
198 (40) (**Table S2**). Of note, interaction outcomes for this dataset measured regimen efficacy  
199 based on sputum clearance after two months of treatment. We found that model predictions  
200 were significantly correlated ( $R = 0.52$ ,  $p \sim 10^{-5}$ , **Fig. S4C**) with sputum clearance, and that  
201 model predictions classified as synergistic ( $IS < 0.9$ ) captured most of the efficacious  
202 treatments (sputum clearance  $> 80\%$ ) amongst all 57 TB regimens (**Fig. S4D**). These results  
203 were comparable to both literature- (29) and omic-based results across all three performance  
204 measurements (**Fig. 2**). Overall, we found that our approach retained high accuracies in  
205 predicting combination therapy outcomes for a diverse set of test cases based on *E. coli* and  
206 *M. tb* data. This is striking considering that CARAMeL solely relies on simulated metabolic  
207 information, which was determined using only  $\sim 25\text{--}35\%$  of available omics data.



## ***CARAMEL enables large-scale investigation of combination therapy outcome in different growth environments***

To demonstrate the power of using GEMs in predicting condition-specific combination therapy outcomes, we applied the CARAMEL approach to predict pairwise drug interactions in multiple media conditions. For this task, we used experimental data for *E. coli* treated with four single drug treatments (AZTreonam, CEFoxitin, TETtracycline, TOBramycin) and two pairwise drug treatments (CEF + TET, CEF + TOB) (**Table S3**). Of note, this treatment panel evaluated the metabolic response in *E. coli* to bactericidal (i.e., death-inducing) and bacteriostatic (i.e., growth-inhibiting) drugs, both individually and in combination. Each drug treatment outcome was assessed in *E. coli* cultured in Biolog phenotype microarray (PM) (41) plate-1, which measured metabolic respiration in 96 carbon sources (**Fig. 3A**). Out of these 96 media conditions, 57 could be simulated based on the metabolites annotated in the *E. coli* GEM. As a result, ML model development and all downstream analyses were conducted using the data subset pertaining to the 57 media conditions that were simulated.

We constructed a ML model using the following inputs: flux profiles for the four drug treatments as well as the 57 media conditions, and interaction outcomes for 228 (4 \* 57) drug-media combinations. We then evaluated our model by predicting outcomes for 114 (2 \* 57) drug-drug-media combinations (**Fig. 3B**). Overall, we found that model predictions significantly correlated with experimental outcomes ( $R = 0.62$ ,  $p < 10^{-16}$ , **Fig. 3C**). We also assessed correlations specific to each drug pair and found that model predictions still corresponded well with experimental data (CEF+TET:  $R = 0.58$ ,  $p \sim 10^{-6}$ , CEF+TOB:  $R = 0.78$ ,  $p < 10^{-16}$ ). This large-scale inspection of combination therapy outcome in different growth environments was only possible with the CARAMEL approach, where flux profiles could be determined for 57 media conditions. A direct comparison of the same scale was not possible with the omic-based approach, as chemogenomic data was only available for five media conditions. Moreover, our approach enables combination therapy design for condition-specific cases. This is critical for successful clinical translation, considering that the predominant carbon source can change depending on where bacteria reside inside the host (2).

## ***The CARAMEL approach was extended to predict outcomes for sequential interactions***

Current approaches for predicting combination therapy outcomes focus on drug treatments that are given simultaneously. Here, we extended our approach to predict treatment efficacy for time- and order-dependent (i.e., sequential) interactions. In contrast to simultaneous combinations, the order and length of each drug treatment dictates how a pathogen adapts itself, and in turn, influences its sensitivity to successive drug treatments. As such, interaction outcomes are interpreted as leading to collateral sensitivity (analogous to synergy) or cross-resistance (analogous to antagonism). For this task, we used data for *E. coli* evolved in single drug treatments for three timespans (10, 21, and 90 days) then subsequently treated with a second drug (38, 42, 43). To account for both time- and order-dependent drug effect, we re-defined the delta scores for sequential joint profiles. Briefly, delta scores were defined as the difference in binarized drug profiles normalized by the total treatment time (mathematically defined for pairwise sequences below):

$$\delta = \frac{t_2^v_2 - t_1^v_1}{(t_1 + t_2)} \quad \text{Eq. 1}$$

251 where  $\delta$  = delta scores,  $t$  = length of treatment time, and  $v$  = binarized flux profile.

252 To initially assess how well the CARAMeL approach could predict sequential treatment  
253 outcomes, we first conducted a 10-fold cross-validation of the sequential data ( $N = 628$ ),  
254 which involved 27 unique drugs (**Table S4**). We found that CARAMeL predictions  
255 moderately, but significantly, correlated with experimental outcomes ( $R = 0.50$ ,  $p < 10^{-16}$ ,  
256 **Fig. 4A**). Further, the model performed well in determining whether a sequential interaction  
257 resulted in collateral sensitivity ( $IS < -0.1$ , AUROC = 0.76) or cross-resistance ( $IS > 0.1$ ,  
258 AUROC = 0.76) (**Fig. 4D**).

259 We next evaluated the extent of our model's predictive power by conducting two types of  
260 leave-out analyses: (a) leave-first-drug-out and (b) leave-second-drug-out. The first case  
261 tested whether the model could generalize sequential treatment outcomes for an unknown  
262 evolved strain, while the second case assessed whether the model could generalize the  
263 immediate effect of a drug on strains evolved in other drugs. For a leave-out analysis, all  
264 interactions involving the drug of interest in the appropriate sequence position (first or  
265 second) were left out of model training and instead predicted for by the trained model.  
266 Similar to the cross-validation analysis, model performance was measured by the overall  
267 Spearman correlation and AUROC values for collateral sensitivity and cross-resistance. We  
268 found that both leave-out analyses yielded predictions similar to those attained from cross-  
269 validation (**Figs. 4B, 4C, 4E, and 4F**). Overall, these results indicate that CARAMeL  
270 generates robust and accurate predictions for sequential interactions.

### 271 ***Treatment time and entropy are key factors that determine combination therapy potency***

272 To gain mechanistic insight into which factors influence combination therapy outcomes, we  
273 trained a CARAMeL model using all interaction data available for *E. coli*. Broadly, this  
274 included three sets of simultaneous combinations (27, 28) (including data from our Biolog  
275 experiment) and three sets of sequential interactions (38, 42, 43). To account for differing  
276 units of measurement between datasets, we scaled interaction scores according to the  
277 following formula:

$$x_{scaled} = \frac{x}{\max|x|} \quad \text{Eq. 2}$$

278 where  $x$  is a vector of interaction scores for a given dataset. Of note, we applied a  $\log_2$   
279 transformation to the Biolog data prior to scaling this dataset using Eq. 2. These steps  
280 constrained all interaction scores to range between  $\pm 1$  while retaining the sign consensus  
281 for classifying interactions based on their score (negative IS  $\rightarrow$  synergy, positive IS  $\rightarrow$   
282 antagonism). In total, we trained our model on 1,308 drug interactions and attained highly  
283 accurate predictions ( $R = 0.80$ ,  $p < 10^{-16}$ ) for both synergistic ( $IS < -0.1$ , AUROC = 0.80)  
284 and antagonistic ( $IS > 0.1$ , AUROC = 0.91) interactions.

285 Using the Random Forests algorithm, we ranked features by their predictive importance  
286 based on how the model accuracy decreases when a feature is removed (**Methods**). As our  
287 model was trained on both simultaneous and sequential interactions, four types of features  
288 were provided: (a) sigma scores (combined effect), (b) delta scores (unique effect), (c)  
289 metabolic entropy, and (d) time interval between treatments. Interestingly, the time feature  
290 was found to be most important (**Data S1**). This highlights the fact that the outcome for a  
291 drug combination can greatly differ when treatments are given simultaneously versus when  
292 they are prescribed in a sequential manner. This can be seen when we compare interaction

293 scores for simultaneous and sequential treatments involving the same set of drugs (**Fig. 5A**).  
294 For example, collateral sensitivity frequently arises when *E. coli* is first weakened by an  
295 aminoglycoside and then treated with an antibiotic from another class, potentially due to a  
296 reduction in the proton-motive force across the inner membrane (44). However, synergy is  
297 not frequently observed for this set of drug combinations when given simultaneously.  
298 Another example is the case when *E. coli* is first treated with a quinolone then exposed to  
299 an antibiotic from another class. This type of sequence generally leads to cross-resistance  
300 (45), likely due to increased DNA damage by quinolones (46), but no trend towards synergy  
301 or antagonism is observed when the drugs are given simultaneously (**Fig. 5A**).

302 In addition to time, entropy was a top predictor that distinguished between different  
303 interaction types. Specifically, antagonistic and cross-resistant interactions seemed to  
304 impose lower overall entropy in the metabolic response to drug treatment compared to  
305 neutral interactions ( $p < 0.05$ ) and those leading to synergy or collateral sensitivity (**Fig.**  
306 **5B**). Previously, Zhu *et al.* found that low fitness and bacterial sensitivity to antibiotics are  
307 associated with large transcriptional disorder (7). Interestingly, here we found that cross-  
308 resistant and antagonistic interactions generally imposed less metabolic disarray than  
309 synergistic or additive (i.e., neutral) interactions. These observations indicate that the  
310 bacterial stress response, as measured via entropy, is a useful proxy to determine how  
311 antagonistic a combination therapy will be regardless of treatment time or order.

### 312 ***Top CARAMeL features mechanistically explain combination efficacy in different*** 313 ***carbon sources***

314 Including time and entropy, we found that 652 features explained 95% of the variance in  
315 model predictions (**Data S1**). We subsequently determined that the differential flux through  
316 244 out of the 360 GEM reactions associated with these top features significantly  
317 distinguished between synergistic and antagonistic interactions (two-sample t-test, p-value  
318  $< 0.05$ , **Data S2**). Finally, we deduced that 13 metabolic pathways were enriched by this set  
319 of 244 reactions (**Table 1**). Differential activity through these pathways aligned with the  
320 expected metabolic response to antibiotic treatments. For example, increased flux through  
321 DNA repair systems (e.g., nucleotide salvage) is an expected response after exposure to  
322 quinolones, which target DNA gyrase (47). Differential flux through transport reactions is  
323 also an expected response that decreases drug concentrations within the bacterial cell,  
324 therefore minimizing their adverse effects on fitness (48).

325 Beyond explaining general metabolic responses to antibiotic stress, our top model predictors  
326 also revealed insights into the efficacy for drug treatments used in our Biolog experiment.  
327 Among the 244 reactions deduced from top model predictors, we found that increased flux  
328 through fructose 1,6-bisphosphatase (FBPase) led to significantly greater efficacy for all six  
329 drug treatment conditions (two-sample t-test,  $p < 0.05$ , **Fig. 6A**). FBPase is an enzyme active  
330 during gluconeogenesis and catalyzes the conversion of fructose 1,6-bisphosphate to  
331 fructose 6-phosphate. Upon assessing which PM01 conditions induced increased flux  
332 through FBPase, we found that the vast majority contained carbon sources downstream of  
333 the last step in glycolysis, which produces pyruvate (**Data S3**). Increased FBPase activity  
334 within these conditions is most likely explained by the need to activate gluconeogenesis to  
335 synthesize the cell wall and other biomass precursors for optimal growth (49). Of note,  
336 antagonism is predicted to occur due to opposing drug effects on cellular respiration (50).  
337 By increasing flux towards the TCA cycle, gluconeogenic substrates may reduce the  
338 potential for antagonistic metabolic effects (51) and, in turn, increase drug potency (**Fig.**



339 **6B**). Activation of gluconeogenesis is also essential for *E. coli* and *M. tb* growth *in vivo* (52,  
340 53). This observation could be used to design synergistic therapies that are effective *in vivo*.

### 341 **Screening candidate therapies with robust synergy and collateral sensitivity**

342 Synergy observed in the lab may not result in synergy *in vivo* due to differences in growth  
343 conditions or drug pharmacokinetics, wherein drugs may reach the infection site at different  
344 times rather than simultaneously (54). Considering these factors, combination therapies that  
345 show synergy across growth conditions and time scales hold the best potential for successful  
346 clinical translation. To discover such therapies, we predicted pairwise regimen outcomes  
347 for all drugs for which the *E. coli* CARAMeL model was trained on ( $N = 33$ ). For each drug  
348 pair, we evaluated three cases: (a) simultaneous treatment ( $D_1 + D_2$ ), (b) sequential  
349 treatment from  $D_1$  to  $D_2$ , and (c) sequential treatment from  $D_2$  to  $D_1$ . For sequential  
350 interactions, we set the duration for the first treatment to 14 days, based on the most  
351 commonly prescribed antibiotic treatment duration against bloodstream infection by  
352 Enterobacteriaceae (55), and one day for the second treatment. In total, we generated  
353 predictions for 90,288 combinations that differed based on interaction type and growth  
354 environment ( ${}_{33}C_2$  pairs x 3 types x 57 PM01 growth conditions, **Data S4**).

355 Out of the 528 ( ${}_{33}C_2$ ) drug pairs that we screened, 190 were predicted to yield synergy for  
356 at least one case out of 171 (3 types x 57 PM01 conditions) (**Fig. 7A**). Surprisingly, only a  
357 small subset ( $N = 6$ ) were predicted to be both synergistic ( $IS_{\text{simultaneous}} < 0$ ) and lead to  
358 collateral sensitivity ( $IS_{\text{sequential}} < 0$ ) consistently across multiple ( $N > 10$ ) carbon sources  
359 (**Data S5, Figs. 7B and 7C**). Interestingly, only one drug pair (amikacin-ampicillin) was  
360 robustly synergistic across all three cases ( $D_1 + D_2$ ,  $D_1 \rightarrow D_2$ ,  $D_2 \rightarrow D_1$ ). Amikacin-  
361 ampicillin treatment has previously been shown to be clinically effective for a wide range  
362 of infections (56–58) including treatment of bacteremia in neutropenic patients (59) and  
363 neonatal bacterial infections (60). Increased sensitivity to ampicillin or amikacin in both  
364 simultaneous and sequential scenarios has also been experimentally observed (61).  
365 Collateral sensitivity in ampicillin  $\rightarrow$  amikacin treatment is most likely explained by  
366 increased amikacin penetration that occurs after cell wall disruption by ampicillin (a beta-  
367 lactam) (62). For the reverse case (amikacin  $\rightarrow$  ampicillin treatment), the predicted synergy  
368 is most likely explained by the increased sensitivity due to disrupted membrane potential  
369 and ROS generation that typically occur when *E. coli* is first treated with an aminoglycoside  
370 (44, 63–65).

371 The remaining four drug pairs involved interactions between rifampicin, tetracycline,  
372 azithromycin, and fusidic acid. One pair (rifampicin-azithromycin) has demonstrated  
373 clinical efficacy in treating arthritis (66) induced by pathogenic Chlamydia (Gram-  
374 negative). Another pair (rifampicin-fusidic acid) has shown clinical efficacy against  
375 prosthetic joint infection caused by drug-resistant staphylococci (Gram-positive) (67). Drug  
376 treatment with rifampicin combined with minocycline (a tetracycline derivative) has also  
377 been shown to prevent colonization by slime-producing staphylococci in catheters (68). Of  
378 note, rifampicin-minocycline, as well as rifampicin combined with other drugs, has been  
379 advised as treatment for Gram-negative and non-mycobacterial infections (69, 70). Further  
380 investigation into these combinations may be of interest considering the ever-present  
381 concern over bacterial resistance to rifampicin (71).

## 382 Discussion

383 Here we introduced CARAMeL, a modeling approach to design condition-specific  
384 antibiotic regimens. We have shown that CARAMeL can be extended to account for the  
385 growth environment and sequential drug interactions. Ultimately, CARAMeL offers  
386 multiple advantages over prior methods of similar nature. First, our approach enables use of  
387 diverse data sources (e.g., chemogenomics, transcriptomics) and/or their combined use,  
388 therefore maximizing the number of drugs that are screened. Moreover, the use of GEMs  
389 enables simulation of highly tunable growth conditions, which may be leveraged to  
390 investigate combination therapy outcomes in the host environment. We also extended our  
391 approach to factor different time intervals when designing combination therapies, which  
392 may be critical for mitigating resistance.

393 Most importantly, the CARAMeL model provides systems-level insight into factors that  
394 influence treatment potency. First, combination therapy outcome is highly dependent on  
395 how drugs are prescribed together (simultaneously vs. sequentially). Hence, solely  
396 optimizing synergy of simultaneous treatments may unintentionally exacerbate AMR.  
397 Analysis of the drug interaction landscape suggests that only a small fraction ( $< 1\%$ ) of  
398 screened combinations show robust synergy across growth conditions and time intervals:  
399 amikacin-ampicillin, rifampicin-azithromycin, rifampicin-fusidic acid, rifampicin-  
400 tetracycline, tetracycline-fusidic acid, and vancomycin-fusidic acid. Clinical evidence for  
401 efficacy exists for the first four regimens (57–60, 66–70), while the last two may be worth  
402 investigating as potential additions to our therapeutic arsenal against AMR.

403 Secondly, we affirmed that system-wide entropy is a generalizable predictor for antibiotic  
404 sensitivity and can be used to identify antagonistic interactions between combinations of  
405 stressors. Thirdly, we showed that all six drug treatments used in our Biolog experiment  
406 were significantly more potent in gluconeogenic carbon sources. This heightened potency  
407 may be explained by increased flux through the TCA cycle that reduces antagonistic effects  
408 (**Fig. 6B**).

409 Although the use of GEMs in CARAMeL offers major advantages with data compatibility,  
410 condition tunability, and mechanistic insight, it also introduces some limitations. The level  
411 of accuracy and thoroughness in GEM annotation may influence CARAMeL model  
412 performance. Moreover, our current approach only provides a “snapshot” perspective of the  
413 metabolic response to a condition. This may be a potential reason for the slightly diminished  
414 CARAMeL model performance in predicting sequential outcomes. Nevertheless, these are  
415 areas that can be addressed with continued curation of GEMs (72) and advances in dynamic  
416 metabolic modeling (73). Overall, the ability to simulate specific growth environments  
417 offers the potential to evaluate treatment efficacy *in vivo* and advance clinical translation of  
418 novel antibiotic regimens. Moreover, these combination therapies could restore use of  
419 defunct antibiotics against resistant pathogens while mitigating further resistance (16, 74).

## Materials and Methods

### *Experimental Design (Biolog Phenotype Microarray)*

*E. coli* MG1655 was cultured in Biolog phenotype microarray (PM) 1, which screened bacterial growth in 95 carbon sources and a negative control (i.e., water) (41). *E. coli* was subsequently treated with six distinct drug treatments in duplicate: aztreonam (0.03 ug/mL), cefoxitin (1.87 ug/mL), tetracycline (1.42 ug/mL), tobramycin (0.15 ug/mL), cefoxitin (1.87 ug/mL) + tetracycline (1.42 ug/mL), and cefoxitin (1.87 ug/mL) + tobramycin (1.42 ug/mL). Including a reference plate (*E. coli* growth in PM01 only), phenotype in each treatment was colorimetrically measured in duplicate using tetrazolium violet dye, which quantifies cellular respiration. All experimental procedures, data collection, and quality control were performed at Biolog, Inc. The area under the respiration curve was calculated using MATLAB and reported as the ratio of treatment to reference.

### *Simulating Metabolic Flux using GEMs*

The *E. coli* GEM iJO1366 (33) and the *M. tb* GEM iEK1008 (34) were used to simulate metabolic fluxes at steady-state. To simulate drug flux profiles, chemogenomic data for *E. coli* (35) and transcriptomic data for *M. tb* (29) served as GEM constraints. Specifically, differential gene regulation in response to drug treatment was uniquely inferred from each dataset. For chemogenomic data, which measured single-gene knockout (KO) fitness, genes whose KOs promoted growth were assumed as dispensable while gene KOs that resulted in low fitness were assumed to be essential for growth in said condition. Based on these assumptions, genes corresponding with low ( $z < -2$ ) and high ( $z > 2$ ) fitness were inferred to be up- and down-regulated, respectively. For transcriptomic data, which measured single-gene expression, up- and down-regulation were directly inferred based on high ( $z > 2$ ) and low ( $z < -2$ ) expression values, respectively. These processes yielded individual sets of differentially regulated genes that were integrated into corresponding GEMs using a linear optimization version of the integrative metabolic analysis tool (iMAT) algorithm (75, 76). To determine media flux profiles, metabolite availability was computationally defined by constraining exchange reactions annotated in iJO1366. For each carbon source of interest (e.g., glycerol), the lower bound (i.e., uptake rate) for the corresponding exchange reaction (e.g., glycerol exchange) was set to -10 to allow cellular intake.

Of note, use of the linear iMAT algorithm required constraint-based modeling (CBM) parameter fine-tuning for three variables: kappa, rho, and epsilon (77). Kappa and rho serve as relative weights for “off” and “on” reactions associated with the differentially expressed genes, respectively, in their contribution to the objective function. Epsilon represents the minimum flux through “on” reactions. For the purposes of this research, we varied all three parameter values from  $10^{-3}$  to 1 and determined the optimal parameter set based on three criteria: (1) maximizing the Spearman correlation between predicted and actual interaction scores after 10-fold cross-validation using a training dataset, (2) minimizing the number of conditions simulated to have no growth, and (3) ensuring non-zero variability in the simulated growth rates between conditions. **Table S5** provides results for all three assessments for all parameter sets of interest. The following optimal parameter values were obtained for each GEM using the training dataset: (1) iJO1366 – kappa =  $10^{-2}$ , rho =  $10^{-2}$ , epsilon = 1, and (2) iEK1008 – kappa =  $10^{-2}$ , rho =  $10^{-2}$ , epsilon =  $10^{-2}$ . These parameter values were used for all results when benchmarking CARAMeL against previous approaches based on *E. coli* and *M. tb* drug interaction datasets (**Table S6**).

### Data Processing to Determine Joint Profiles

Flux profiles were used to define joint profiles for each drug combination, which were comprised of four pieces of information: sigma scores, delta scores, cumulative entropy, and length of treatment interval (**Fig. S2**). Sigma and delta scores were representative of the combined and unique effect of drugs involved in a combination, respectively. Both score types were determined after flux profiles were binarized based on differential flux activity (either positive or negative) in comparison to baseline, mathematically defined below:

$$v_{i, positive} = \begin{cases} 1 & \frac{v_{i, treatment}}{v_{i, baseline}} > 2 \\ 0 & otherwise \end{cases}, v \in \mathbb{R}^m \quad Eq. 3a$$

$$v_{i, negative} = \begin{cases} 1 & \frac{v_{i, treatment}}{v_{i, baseline}} < -2 \\ 0 & otherwise \end{cases}, v \in \mathbb{R}^m \quad Eq. 3b$$

where  $v$  = reaction flux and  $m$  = total number of GEM reactions. Sigma scores were mathematically defined for both simultaneous and sequential interactions using the following equation:

$$\sigma_i = \frac{2}{n} \sum_{j=1}^n v_{i, j}, v \in \mathbb{R}^{m \times n} \quad Eq. 4$$

where  $\sigma$  = sigma score,  $v$  = binarized flux profile,  $m$  = total number of GEM reactions, and  $n$  = total number of conditions in a combination. Delta scores were separately defined for simultaneous and sequential interactions based on *Eq. 5a* and *Eq. 5b*, respectively:

$$\delta_i = \begin{cases} 1 & \sum_{j=1}^n v_{i, j} = 1 \\ 0 & otherwise \end{cases}, v \in \mathbb{R}^{m \times n} \quad Eq. 5a$$

$$\delta_i = t_n v_{i, n} - \sum_{j=1}^{n-1} t_j v_{i, j}, t \in \mathbb{R}^n, v \in \mathbb{R}^{m \times n} \quad Eq. 5b$$

where  $\delta$  = delta score,  $t$  = treatment time,  $v$  = binarized flux profile,  $m$  = total number of GEM reactions, and  $n$  = total number of conditions in a combination. Cumulative entropy features were determined by processing non-binarized flux profiles in two steps. First, metabolic entropy for each condition was mathematically defined by the following equation:

$$H_j = \ln(\sigma_j^2) \quad Eq. 6$$

where  $H_j$  = entropy and  $\sigma_j^2$  = variance in non-binarized flux profile. Of note, this formulation was adapted from Zhu *et al.*, who quantified entropy of the bacterial stress response to antibiotics (7). Next, the mean and sum in entropy for all conditions involved in an interaction were used to define two distinct entropy features. Finally, the time feature was defined as the time interval between the first and last treatment for a combination. For simultaneous interactions, the time feature was set to zero.

### ML Model Development using Random Forests

All CARAMeL models were built in MATLAB (Mathworks, Inc.) using the regression-based Random Forests (RF) algorithm (78). Briefly, RF is an ensemble method comprised of decision trees that learn to associate feature information to a target variable. For the

493 regression-based approach, the RF model returns the mean prediction from all decision  
494 trees. To develop CARAMeL models, joint profiles served as feature information while  
495 drug interaction scores were used as the target variable. Interaction scores were quantified  
496 using the Loewe additivity model (79), which is based on drug concentrations (refer to the  
497 original sources of drug interaction datasets for further details in score calculation). Both  
498 joint profiles and interactions scores for drug combinations of interest were used as model  
499 inputs during training, while only joint profiles were provided as input during model testing.  
500 Default values for all other model parameters were used during both training and testing.

### 501 ***ML Model Performance Assessment***

502 Model performance was evaluated based on two metrics: (1) the Spearman correlation  
503 between actual and predicted interaction scores and (2) the area under the receiver operating  
504 curve (AUROC) for classifying interactions as synergistic or antagonistic. Of note, model  
505 predictions for TB regimens used in clinical trials were negative transformed before being  
506 compared to clinical outcomes. Since these clinical trials reported percentage of patients  
507 that were cured, we would expect to see a negative correlation between interaction scores  
508 and clinical efficacy, with synergistic regimens ( $IS < -0.1$ ) performing better than  
509 antagonistic regimens. The sign for the scores were hence flipped to maintain a positive  
510 correlation indicating good model performance. Classification of simultaneous drug  
511 interactions was based on score threshold values reported in the original literature for a  
512 dataset. For both sequential interactions and the CARAMeL model trained on all interaction  
513 data for *E. coli*, interaction scores were first scaled by the maximum absolute value (Eq. 2).  
514 Interaction values below -0.1 and above 0.1 were then used to classify interactions as  
515 synergistic and antagonistic, respectively. For the 10-fold cross-validation analysis  
516 conducted for sequential interactions, the interaction data was randomly partitioned into ten  
517 subsets of similar size ( $N \sim 63$ ). CARAMeL was then applied to predict each subset at a  
518 time, where the given subset was left out of the model training (i.e., the remaining 90% of  
519 the data was used to train the model). All model predictions were then compared to the  
520 sequential data as a whole to calculate the overall Spearman correlation and AUROC values.

### 521 ***CARAMeL Top Feature Extraction***

522 Top features were determined based on their ranked importance in generating accurate  
523 predictions. To calculate feature importance, each feature was first left out of model training  
524 and testing. The mean squared error (MSE) between predicted and true interaction scores  
525 was then calculated for each model. Finally, feature importance was measured as the  
526 increase in MSE for a model lacking a feature compared to the model trained on all features.  
527 After ranking features according to decreasing importance, the first set of features  
528 amounting to a cumulative importance of 0.95 (corresponding to 95% variance explained)  
529 were selected for downstream model interpretation and analysis.

### 530 ***Statistical Analysis***

531 A one-way analysis of variance (ANOVA) test was used to compare both the entropy mean  
532 and entropy sum of drug interactions grouped by their classification (synergy, neutral,  
533 antagonism). A multiple comparison test based on Tukey's honestly significant difference  
534 (HSD) was subsequently performed to identify statistically significant pairwise differences  
535 using a p-value threshold of 0.05. A two-sample Student's t-test with unequal variance was  
536 used to define which reactions distinguished between synergistic and antagonistic  
537 interactions based on differential flux activity. The same test was used to determine  
538 significant differences in drug treatment potency between carbon sources with and without



539 differential flux through FBPase. Lastly, a hypergeometric test was conducted to determine  
540 significantly enriched metabolic pathways based on GEM reactions associated with top  
541 CARAMeL predictors. For this test, the total number of reactions annotated in iJO1366  
542 corresponded with the population size.

## 543 References

- 544 1. J. M. A. Blair, M. A. Webber, A. J. Baylay, D. O. Ogbolu, L. J. V Piddock, Molecular  
545 mechanisms of antibiotic resistance. *Nat. Rev. Microbiol.* **13** (2015), pp. 42–51.
- 546 2. S. A. Brown, K. L. Palmer, M. Whiteley, Revisiting the host as a growth medium. *Nat.*  
547 *Rev. Microbiol.* **6** (2008), pp. 657–666.
- 548 3. T. M. Fuchs, W. Eisenreich, J. Heesemann, W. Goebel, Metabolic adaptation of human  
549 pathogenic and related nonpathogenic bacteria to extra- and intracellular habitats. *FEMS*  
550 *Microbiol. Rev.* **36** (2012), pp. 435–462.
- 551 4. M. A. Kohanski, D. J. Dwyer, B. Hayete, C. A. Lawrence, J. J. Collins, A Common  
552 Mechanism of Cellular Death Induced by Bactericidal Antibiotics. *Cell.* **130**, 797–810  
553 (2007).
- 554 5. A. T. Dharmaraja, Role of Reactive Oxygen Species (ROS) in Therapeutics and Drug  
555 Resistance in Cancer and Bacteria. *J. Med. Chem.* **60**, 3221–3240 (2017).
- 556 6. J. L. Martínez, F. Rojo, Metabolic regulation of antibiotic resistance. *FEMS Microbiol.*  
557 *Rev.* **35**, 768–789 (2011).
- 558 7. Z. Zhu, D. Surujon, J. C. Ortiz-Marquez, W. Huo, R. R. Isberg, J. Bento, T. van Opijnen,  
559 Entropy of a bacterial stress response is a generalizable predictor for fitness and antibiotic  
560 sensitivity. *Nat. Commun.* **11**, 1–15 (2020).
- 561 8. M. A. Farha, E. D. Brown, Drug repurposing for antimicrobial discovery. *Nat. Microbiol.* **4**  
562 (2019), pp. 565–577.
- 563 9. M. Tyers, G. D. Wright, Drug combinations: a strategy to extend the life of antibiotics in  
564 the 21st century. *Nat. Rev. Microbiol.* **17** (2019), pp. 141–155.
- 565 10. K. M. Pluchino, M. D. Hall, A. S. Goldsborough, R. Callaghan, M. M. Gottesman,  
566 Collateral sensitivity as a strategy against cancer multidrug resistance. *Drug Resist. Updat.*  
567 **15**, 98–105 (2012).
- 568 11. S. Vijayaraghavalu, J. K. Dermawan, V. Cheriyaath, V. Labhasetwar, Highly synergistic  
569 effect of sequential treatment with epigenetic and anticancer drugs to overcome drug  
570 resistance in breast cancer cells is mediated via activation of p21 gene expression leading  
571 to G2/M cycle arrest. *Mol. Pharm.* **10**, 337–352 (2013).
- 572 12. C. Pál, B. Papp, V. Lázár, Collateral sensitivity of antibiotic-resistant microbes. *Trends*  
573 *Microbiol.* **23** (2015), pp. 401–407.
- 574 13. G. Gadamski, D. Ciarka, J. Gressel, S. W. Gawronski, Negative cross-resistance in  
575 triazine-resistant biotypes of *Echinochloa crus-galli* and *Conyza canadensis*. *Weed Sci.* **48**,  
576 176–180 (2000).
- 577 14. S. G. Deeks, Treatment of antiretroviral-drug-resistant HIV-1 infection. *Lancet.* **362**  
578 (2003), pp. 2002–2011.
- 579 15. A. K. Lukens, L. S. Ross, R. Heidebrecht, F. J. Gamo, M. J. Lafuente-Monasterio, M. L.  
580 Booker, D. L. Hartl, R. C. Wiegand, D. F. Wirth, Harnessing evolutionary fitness in  
581 *Plasmodium falciparum* for drug discovery and suppressing resistance. *Proc. Natl. Acad.*  
582 *Sci. U. S. A.* **111**, 799–804 (2014).
- 583 16. M. Baym, L. K. Stone, R. Kishony, Multidrug evolutionary strategies to reverse antibiotic  
584 resistance. *Science (80-. )*. **351**, aad3292–aad3292 (2016).
- 585 17. J. H. Yang, S. N. Wright, M. Hamblin, B. O. Palsson, G. C. Walker, J. J. Collins, A White-  
586 Box Machine Learning Approach for Revealing Antibiotic Mechanisms of Action. *Cell.*

- 587 177, 1649–1661 (2019).
- 588 18. B. Ribeiro da Cunha, L. P. Fonseca, C. R. C. Calado, Simultaneous elucidation of  
589 antibiotic mechanism of action and potency with high-throughput Fourier-transform  
590 infrared (FTIR) spectroscopy and machine learning. *Appl. Microbiol. Biotechnol.* **105**,  
591 1269–1286 (2021).
- 592 19. J. M. Stokes, K. Yang, K. Swanson, W. Jin, A. Cubillos-Ruiz, N. M. Donghia, C. R.  
593 MacNair, S. French, L. A. Carfrae, Z. Bloom-Ackerman, V. M. Tran, A. Chiappino-Pepe,  
594 A. H. Badran, I. W. Andrews, E. J. Chory, G. M. Church, E. D. Brown, T. S. Jaakkola, R.  
595 Barzilay, J. J. Collins, A Deep Learning Approach to Antibiotic Discovery. *Cell.* **180**, 688–  
596 702 (2020).
- 597 20. S. S. El Zahed, E. D. Brown, Chemical-Chemical Combinations Map Uncharted  
598 Interactions in *Escherichia coli* under Nutrient Stress, doi:10.1016/j.isci.2018.03.018.
- 599 21. X.-M. Zhao, M. Iskar, G. Zeller, M. Kuhn, V. van Noort, P. Bork, Prediction of Drug  
600 Combinations by Integrating Molecular and Pharmacological Data. *PLoS Comput. Biol.* **7**,  
601 e1002323 (2011).
- 602 22. J.-H. Lee, D. G. Kim, T. J. Bae, K. Rho, J.-T. Kim, J.-J. Lee, Y. Jang, B. C. Kim, K. M.  
603 Park, S. Kim, CDA: Combinatorial Drug Discovery Using Transcriptional Response  
604 Modules. *PLoS One.* **7**, e42573 (2012).
- 605 23. H. E. Chua, S. S. Bhowmick, L. Tucker-Kellogg, Synergistic target combination prediction  
606 from curated signaling networks: Machine learning meets systems biology and  
607 pharmacology. *Methods.* **129**, 60–80 (2017).
- 608 24. K. E. Regan-Fendt, J. Xu, M. DiVincenzo, M. C. Duggan, R. Shakya, R. Na, W. E. Carson,  
609 P. R. O. Payne, F. Li, Synergy from gene expression and network mining (SynGeNet)  
610 method predicts synergistic drug combinations for diverse melanoma genomic subtypes.  
611 *npj Syst. Biol. Appl.* **5**, 1–15 (2019).
- 612 25. B. Yuan, C. Shen, A. Luna, A. Korkut, D. S. Marks, J. Ingraham, C. Sander, CellBox:  
613 Interpretable Machine Learning for Perturbation Biology with Application to the Design of  
614 Cancer Combination Therapy. *Cell Syst.* **12**, 128-140.e4 (2021).
- 615 26. T. Zhang, L. Zhang, P. R. O. Payne, F. Li, in *Methods in Molecular Biology* (Humana  
616 Press Inc., 2021; <https://pubmed.ncbi.nlm.nih.gov/32926369/>), vol. 2194, pp. 223–238.
- 617 27. S. Chandrasekaran, M. Cokol-Cakmak, N. Sahin, K. Yilancioglu, H. Kazan, J. J. Collins,  
618 M. Cokol, Chemogenomics and orthology-based design of antibiotic combination  
619 therapies. *Mol. Syst. Biol.* **12**, 872 (2016).
- 620 28. M. Cokol, C. Li, S. Chandrasekaran, Chemogenomic model identifies synergistic drug  
621 combinations robust to the pathogen microenvironment. *PLOS Comput. Biol.* **14**, e1006677  
622 (2018).
- 623 29. S. Ma, S. Jaipalli, J. Larkins-Ford, J. Lohmiller, B. B. Aldridge, D. R. Sherman, S.  
624 Chandrasekaran, Transcriptomic signatures predict regulators of drug synergy and clinical  
625 regimen efficacy against tuberculosis. *MBio.* **10** (2019), doi:10.1128/mBio.02627-19.
- 626 30. N. D. Price, J. L. Reed, B. Palsson, Genome-scale models of microbial cells: Evaluating  
627 the consequences of constraints. *Nat. Rev. Microbiol.* **2** (2004), pp. 886–897.
- 628 31. N. E. Lewis, H. Nagarajan, B. O. Palsson, Constraining the metabolic genotype-phenotype  
629 relationship using a phylogeny of in silico methods. *Nat. Rev. Microbiol.* **10** (2012), pp.  
630 291–305.
- 631 32. S. Dahal, J. T. Yurkovich, H. Xu, B. O. Palsson, L. Yang, Synthesizing Systems Biology  
632 Knowledge from Omics Using Genome-Scale Models. *Proteomics.* **20** (2020), p. 1900282.
- 633 33. J. D. Orth, T. M. Conrad, J. Na, J. A. Lerman, H. Nam, A. M. Feist, B. Ø. Palsson, A  
634 comprehensive genome-scale reconstruction of *Escherichia coli* metabolism—2011. *Mol.*  
635 *Syst. Biol.* **7**, 535 (2011).

- 636 34. E. S. Kavvas, Y. Seif, J. T. Yurkovich, C. Norsigian, S. Poudel, W. W. Greenwald, S.  
637 Ghatak, B. O. Palsson, J. M. Monk, Updated and standardized genome-scale reconstruction  
638 of *Mycobacterium tuberculosis* H37Rv, iEK1011, simulates flux states indicative of  
639 physiological conditions. *BMC Syst. Biol.* **12**, 25 (2018).
- 640 35. R. J. Nichols, S. Sen, Y. J. Choo, P. Beltrao, M. Zietek, R. Chaba, S. Lee, K. M.  
641 Kazmierczak, K. J. Lee, A. Wong, M. Shales, S. Lovett, M. E. Winkler, N. J. Krogan, A.  
642 Typas, C. A. Gross, Phenotypic landscape of a bacterial cell. *Cell.* **144**, 143–56 (2011).
- 643 36. E. Dekel, U. Alon, Optimality and evolutionary tuning of the expression level of a protein.  
644 *Nature.* **436**, 588–592 (2005).
- 645 37. T. Maeda, J. Iwasawa, H. Kotani, N. Sakata, M. Kawada, T. Horinouchi, A. Sakai, K.  
646 Tanabe, C. Furusawa, High-throughput laboratory evolution reveals evolutionary  
647 constraints in *Escherichia coli*. *Nat. Commun.* **11**, 5970 (2020).
- 648 38. S. Suzuki, T. Horinouchi, C. Furusawa, Prediction of antibiotic resistance by gene  
649 expression profiles. *Nat. Commun.* **5**, 5792 (2014).
- 650 39. M. Mori, Z. Zhang, A. Banaei-Esfahani, J. Lalanne, H. Okano, B. C. Collins, A. Schmidt,  
651 O. T. Schubert, D. Lee, G. Li, R. Aebersold, T. Hwa, C. Ludwig, From coarse to fine: the  
652 absolute *Escherichia coli* proteome under diverse growth conditions. *Mol. Syst. Biol.* **17**,  
653 e9536 (2021).
- 654 40. L. J. Bonnett, G. Ken-Dror, G. C. K. W. Koh, G. R. Davies, Comparing the Efficacy of  
655 Drug Regimens for Pulmonary Tuberculosis: Meta-analysis of Endpoints in Early-Phase  
656 Clinical Trials. *Clin. Infect. Dis.* **46**, 46–54 (2017).
- 657 41. B. R. Bochner, P. Gadzinski, E. Panomitros, Phenotype Microarrays for high-throughput  
658 phenotypic testing and assay of gene function. *Genome Res.* **11**, 1246–1255 (2001).
- 659 42. L. Imamovic, M. O. A. Sommer, Use of collateral sensitivity networks to design drug  
660 cycling protocols that avoid resistance development. *Sci. Transl. Med.* **5**, 204ra132-  
661 204ra132 (2013).
- 662 43. T. Oz, A. Guvenek, S. Yildiz, E. Karaboga, Y. T. Tamer, N. Mumcuyan, V. B. Ozan, G. H.  
663 Senturk, M. Cokol, P. Yeh, E. Toprak, Strength of selection pressure is an important  
664 parameter contributing to the complexity of antibiotic resistance evolution. *Mol. Biol. Evol.*  
665 **31**, 2387–2401 (2014).
- 666 44. V. Lázár, G. Pal Singh, R. Spohn, I. Nagy, B. Horváth, M. Hrtyan, R. Busa-Fekete, B.  
667 Bogos, O. Méhi, B. Csörgő, G. Pósfai, G. Fekete, B. Szappanos, B. Kégl, B. Papp, C. Pál,  
668 Bacterial evolution of antibiotic hypersensitivity. *Mol. Syst. Biol.* **9**, 700 (2013).
- 669 45. C. C. Sanders, W. E. Sanders, R. V. Goering, V. Werner, Selection of multiple antibiotic  
670 resistance by quinolones,  $\beta$ -lactams, and aminoglycosides with special reference to cross-  
671 resistance between unrelated drug classes. *Antimicrob. Agents Chemother.* **26**, 797–801  
672 (1984).
- 673 46. C. C. Sanders, Mechanisms responsible for cross-resistance and dichotomous resistance  
674 among the quinolones. *Clin. Infect. Dis.* **32** (2001), pp. 1–8.
- 675 47. A. Fàbrega, S. Madurga, E. Giralt, J. Vila, Mechanism of action of and resistance to  
676 quinolones. *Microb. Biotechnol.* **2**, 40–61 (2009).
- 677 48. S. B. Levy, Active efflux, a common mechanism for biocide and antibiotic resistance. *J.*  
678 *Appl. Microbiol.* **92**, 65S-71S (2002).
- 679 49. A. Varma, B. O. Palsson, Metabolic capabilities of *Escherichia coli*. II. Optimal growth  
680 patterns. *J. Theor. Biol.* **165**, 503–522 (1993).
- 681 50. M. A. Lobritz, P. Belenky, C. B. M. Porter, A. Gutierrez, J. H. Yang, E. G. Schwarz, D. J.  
682 Dwyer, A. S. Khalil, J. J. Collins, Antibiotic efficacy is linked to bacterial cellular  
683 respiration. *Proc. Natl. Acad. Sci. U. S. A.* **112**, 8173–8180 (2015).
- 684 51. M. K. Oh, J. C. Liao, Gene expression profiling by DNA microarrays and metabolic fluxes

- 685 in *Escherichia coli*. *Biotechnol. Prog.* **16**, 278–286 (2000).
- 686 52. Y. Bertin, C. Deval, A. De La Foye, L. Masson, V. Gannon, J. Harel, C. Martin, M.  
687 Desvaux, E. Forano, The gluconeogenesis pathway is involved in maintenance of  
688 enterohaemorrhagic *Escherichia coli* O157:H7 in bovine intestinal content. *PLoS One.* **9**,  
689 e98367 (2014).
- 690 53. J. Marrero, K. Y. Rhee, D. Schnappinger, K. Pethe, S. Ehrt, Gluconeogenic carbon flow of  
691 tricarboxylic acid cycle intermediates is critical for *Mycobacterium tuberculosis* to  
692 establish and maintain infection. *Proc. Natl. Acad. Sci. U. S. A.* **107**, 9819–9824 (2010).
- 693 54. J. M. Cicchese, A. Sambarey, D. Kirschner, J. J. Linderman, S. Chandrasekaran, A multi-  
694 scale pipeline linking drug transcriptomics with pharmacokinetics predicts in vivo  
695 interactions of tuberculosis drugs. *Sci. Rep.* **11**, 5643 (2021).
- 696 55. G. S. Tansarli, N. Andreatos, E. E. Pliakos, E. Mylonakis, A Systematic Review and Meta-  
697 analysis of Antibiotic Treatment Duration for Bacteremia Due to Enterobacteriaceae.  
698 *Antimicrob. Agents Chemother.* **63** (2019), doi:10.1128/AAC.02495-18.
- 699 56. K. M. Krause, A. W. Serio, T. R. Kane, L. E. Connolly, Aminoglycosides: An overview.  
700 *Cold Spring Harb. Perspect. Med.* **6** (2016), doi:10.1101/cshperspect.a027029.
- 701 57. Guidelines for the management of adults with hospital-acquired, ventilator-associated, and  
702 healthcare-associated pneumonia. *Am. J. Respir. Crit. Care Med.* **171** (2005), pp. 388–416.
- 703 58. R. P. Dellinger, M. Levy, A. Rhodes, D. Annane, H. Gerlach, S. M. Opal, J. E. Sevransky,  
704 C. L. Sprung, I. S. Douglas, R. Jaeschke, T. M. Osborn, M. E. Nunnally, S. R. Townsend,  
705 K. Reinhart, R. M. Kleinpell, D. C. Angus, C. S. Deutschman, F. R. Machado, G. D.  
706 Rubenfeld, S. A. Webb, R. J. Beale, J. L. Vincent, R. Moreno, L. Aitken, H. Al Rahma, G.  
707 R. Bernard, J. F. Bion, P. Biban, T. Calandra, J. A. Carcillo, T. P. Clemmer, J. V. Divatia,  
708 S. Fujishima, B. Du, S. Gando, G. Guyatt, C. Goodyear-Bruch, J. A. Hazelzet, S. M.  
709 Hollenberg, H. Hirasawa, J. Jacobi, R. M. Kacmarek, I. Jenkins, E. Jimenez, A. E. Jones,  
710 W. Kern, S. O. Koh, J. Kotani, F. Machado, J. Marini, J. C. Marshall, H. Masur, S. Mehta,  
711 J. Muscedere, L. M. Napolitano, M. M. Parker, J. E. Parrillo, H. Qiu, A. G. Randolph, J.  
712 Rello, E. Resende, E. P. Rivers, C. A. Schorr, K. Shukri, E. Silva, M. D. Soth, A. E.  
713 Thompson, J. S. Vender, T. Welte, J. L. Zimmerman, Surviving sepsis campaign:  
714 International guidelines for management of severe sepsis and septic shock: 2012. *Crit.*  
715 *Care Med.* **41**, 580–637 (2013).
- 716 59. J. Palmblad, B. Lönnqvist, Combination of Amikacin and either Ampicillin or Cephalotin  
717 as Initial Treatment of Febrile Neutropenic Patients. *Acta Med. Scand.* **212**, 379–384  
718 (1982).
- 719 60. M. A. Umaña, C. M. Odio, E. Castro, J. L. Salas, G. H. McCracken, Evaluation of  
720 aztreonam and ampicillin vs. amikacin and ampicillin for treatment of neonatal bacterial  
721 infections. *Pediatr. Infect. Dis. J.* **9**, 175–180 (1990).
- 722 61. V. Lorian, J. Ernst, Activity of amikacin and ampicillin in succession and in combination.  
723 *Diagn. Microbiol. Infect. Dis.* **11**, 163–169 (1988).
- 724 62. R. C. Moellering, C. Wennersten, A. N. Weinberg, Studies on antibiotic synergism against  
725 enterococci. I. Bacteriologic studies. *J. Lab. Clin. Med.* **77**, 821–828 (1971).
- 726 63. M. A. Kohanski, D. J. Dwyer, J. Wierzbowski, G. Cottarel, J. J. Collins, Mistranslation of  
727 Membrane Proteins and Two-Component System Activation Trigger Antibiotic-Mediated  
728 Cell Death. *Cell.* **135**, 679–690 (2008).
- 729 64. M. A. Kohanski, D. J. Dwyer, J. J. Collins, How antibiotics kill bacteria: From targets to  
730 networks. *Nat. Rev. Microbiol.* **8** (2010), pp. 423–435.
- 731 65. G. N. Bruni, J. M. Kralj, Membrane voltage dysregulation driven by metabolic dysfunction  
732 underlies bactericidal activity of aminoglycosides. *Elife.* **9**, 1–25 (2020).
- 733 66. J. D. Carter, L. R. Espinoza, R. D. Inman, K. B. Sneed, L. R. Ricca, F. B. Vasey, J.



- 734 Valeriano, J. A. Stanich, C. Oszust, H. C. Gerard, A. P. Hudson, Combination antibiotics  
735 as a treatment for chronic Chlamydia-induced reactive arthritis: A double-blind, placebo-  
736 controlled, prospective trial. *Arthritis Rheum.* **62**, 1298–1307 (2010).
- 737 67. W. Zimmerli, A. Trampuz, P. E. Ochsner, Current concepts: Prosthetic-joint infections. *N.*  
738 *Engl. J. Med.* **351**, 1645–1654 (2004).
- 739 68. I. Raad, R. Darouiche, R. Hachem, M. Sacilowski, G. P. Bodey, Antibiotics and prevention  
740 of microbial colonization of catheters. *Antimicrob. Agents Chemother.* **39**, 2397 (1995).
- 741 69. C. M. J. Drapeau, E. Grilli, N. Petrosillo, Rifampicin combined regimens for Gram-  
742 negative infections: data from the literature. *Int. J. Antimicrob. Agents.* **35**, 39–44 (2010).
- 743 70. G. N. Forrest, K. Tamura, Rifampin combination therapy for nonmycobacterial infections.  
744 *Clin. Microbiol. Rev.* **23** (2010), pp. 14–34.
- 745 71. A. Tupin, M. Gualtieri, F. Roquet-Banères, Z. Morichaud, K. Brodolin, J. P. Leonetti,  
746 Resistance to rifampicin: At the crossroads between ecological, genomic and medical  
747 concerns. *Int. J. Antimicrob. Agents.* **35** (2010), pp. 519–523.
- 748 72. D. B. Bernstein, S. Sulheim, E. Almaas, D. Segrè, Addressing uncertainty in genome-scale  
749 metabolic model reconstruction and analysis. *Genome Biol.* **22** (2021), pp. 1–22.
- 750 73. P. A. Saa, L. K. Nielsen, Formulation, construction and analysis of kinetic models of  
751 metabolism: A review of modelling frameworks. *Biotechnol. Adv.* **35** (2017), pp. 981–  
752 1003.
- 753 74. S. Kim, T. D. Lieberman, R. Kishony, Alternating antibiotic treatments constrain  
754 evolutionary paths to multidrug resistance. *Proc. Natl. Acad. Sci. U. S. A.* **111**, 14494–  
755 14499 (2014).
- 756 75. T. Shlomi, M. N. Cabili, M. J. Herrgård, B. Palsson, E. Ruppín, Network-based prediction  
757 of human tissue-specific metabolism. *Nat. Biotechnol.* **26** (2008), pp. 1003–1010.
- 758 76. F. Shen, L. Boccuto, R. Pauly, S. Srikanth, S. Chandrasekaran, Genome-scale network  
759 model of metabolism and histone acetylation reveals metabolic dependencies of histone  
760 deacetylase inhibitors. *Genome Biol.* **20**, 49 (2019).
- 761 77. F. Shen, C. Cheek, S. Chandrasekaran, Dynamic Network Modeling of Stem Cell  
762 Metabolism. *Methods Mol. Biol.* **1975**, 305–320 (2019).
- 763 78. L. Breiman, Random forests. *Mach. Learn.* **45**, 5–32 (2001).
- 764 79. S. Loewe, H. Muischnek, Über Kombinationswirkungen - Mitteilung: Hilfsmittel der  
765 Fragestellung. *Arch. für Exp. Pathol. und Pharmakologie.* **114**, 313–326 (1926).



766 **Acknowledgments**

767 We thank Brendan Lewis at Biolog for carrying out the Phenotype Microarray assays.

768 **Funding:**

769 National Institutes of Health grant R35 GM13779501 (SC)

770 National Institutes of Health NIAID R56AI150826 (SC)

771 University of Michigan faculty start-up fund (SC)

772 **Author contributions:**

773 Conceptualization: SC

774 Methodology: CHC, SC

775 Investigation: CHC, SC

776 Visualization: CHC

777 Supervision: SC

778 Writing—original draft: CHC

779 Writing—review & editing: CHC, SC

780 **Competing interests:**

781 The authors declare that they have no competing interests.

782 **Data and materials availability:**

783 All datasets and code used within this work are provided through the CARAMeL GitHub  
784 repository (<https://github.com/sriram-lab/CARAMeL>). Additional information on datasets  
785 and results are available in the supplementary materials.

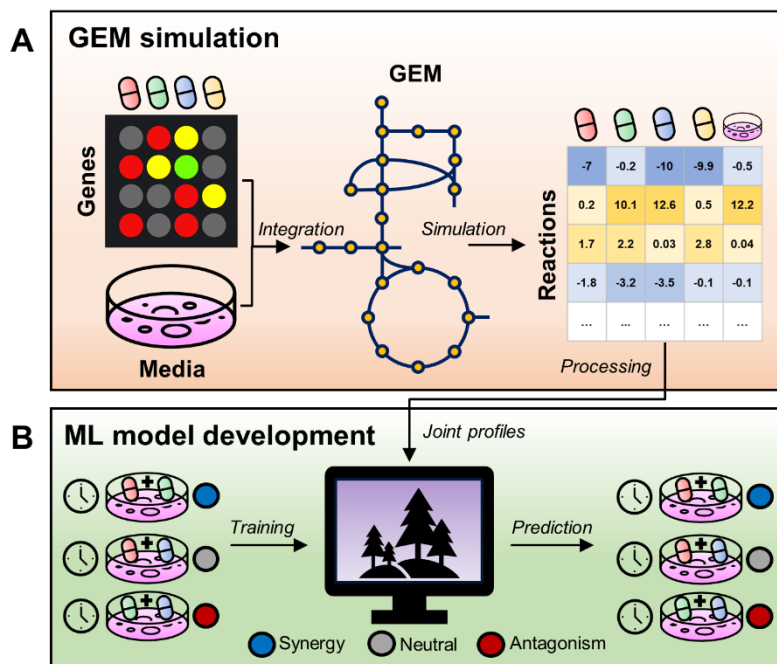

787  
788  
789 **Fig. 1. CARAMeL approach schematic.** The *Condition-specific Antibiotic Regimen Assessment using Mechanistic*  
790 *Learning* (CARAMeL) approach involves a two-step process: (A) omics data (e.g., transcriptomics) measured for  
791 single drug treatments and information on growth media composition are integrated into a genome-scale metabolic  
792 model (GEM) to simulate metabolic flux changes. (B) This information, along with drug interaction data, serve as  
inputs to train a machine learning (ML) model to predict outcomes for novel drug interactions.

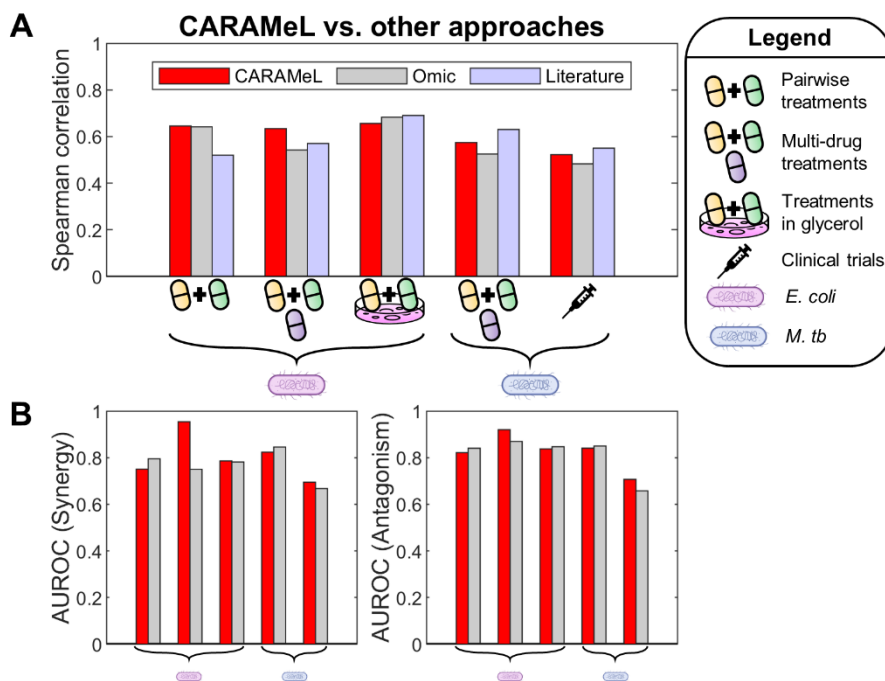

793  
794 **Fig. 2. CARAMeL was benchmarked against other predictive approaches.** Model results for three approaches are  
795 reported: CARAMeL (this study), omics (based on chemogenomic or transcriptomic data as input), and literature  
796 (reported in literature). Model results were quantified based on (A) the Spearman correlation between actual outcomes  
797 and model predictions, and (B) the area under the receiver operating curve (AUROC) for classifying interactions as  
798 synergistic or antagonistic. Direct comparison to literature results is only shown for Spearman correlation.

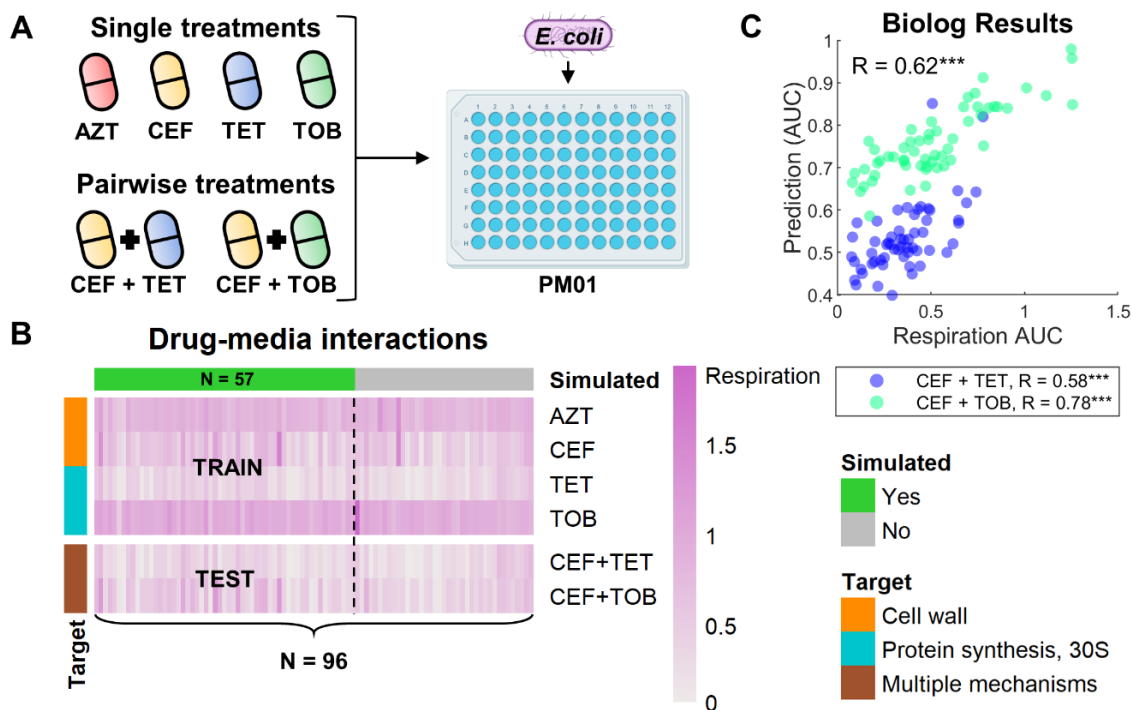

799  
800 **Fig. 3. CARAMeL accurately predicted drug interaction outcomes in 57 carbon sources.** (A) *E. coli* was cultured  
801 in 96 carbon sources (Biolog PM01 plate), then treated with four single drug treatments (AZTreonam, CEFoxitin,  
802 TETtracycline, TOBramycin) and two pairwise treatments (CEF + TET and CEF + TOB). (B) Heatmap of metabolic  
803 activity (measured based on the respiration ratio between treatment vs. control) in response to all experimental  
804 perturbations. (C) Spearman correlation between experimental outcome and model predictions for all combinations in  
805 the test set are shown. \*\*\* p-value <  $10^{-3}$ .

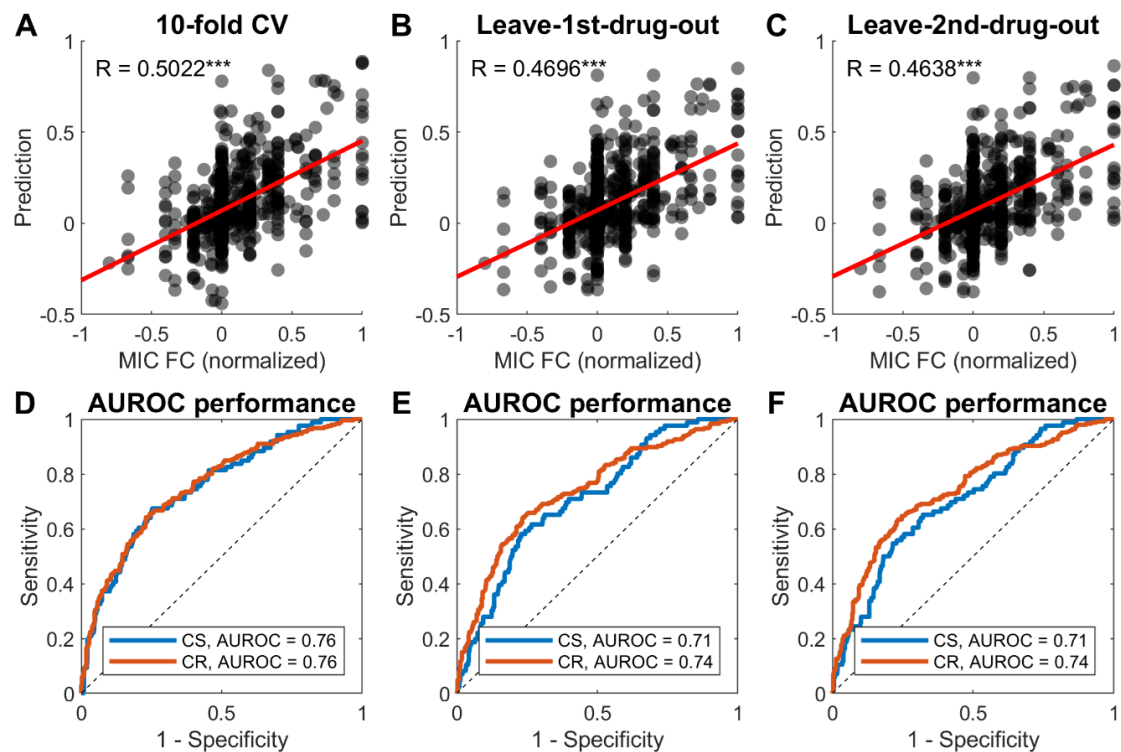

806  
807 **Fig. 4. 10-fold cross-validation and leave-out analysis results for sequential drug interactions.** CARAMeL model  
808 performance for (A, D) 10-fold cross-validation, (B, E) leave-first-drug-out, and (C, F) leave-second-drug-out  
809 analyses. MIC: minimal inhibitory concentration; FC: fold-change, CS: collateral sensitivity, CR: cross-resistance.  
810 \*\*\*p-value <  $10^{-3}$ .

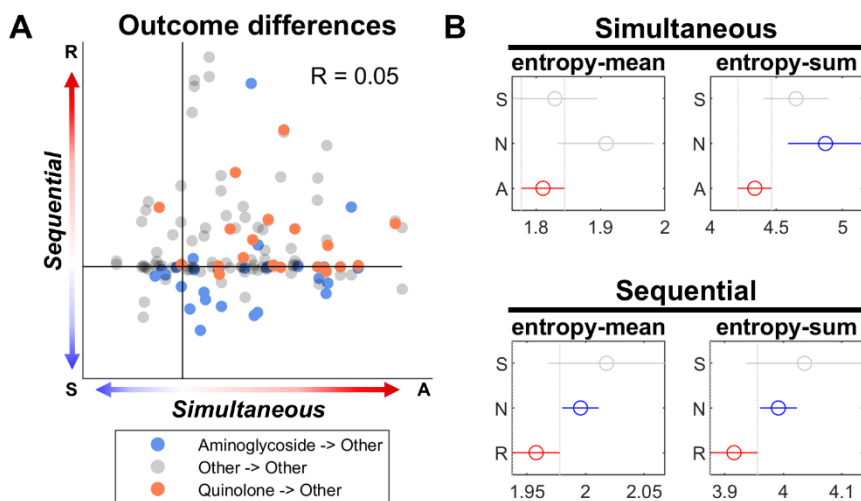

**Fig. 5. Treatment time and metabolic entropy are highly predictive of combination therapy outcomes.** (A) Interaction outcomes considerably differ between simultaneous and sequential treatments. (B) Drug combinations that lead to antagonism (A) or cross-resistance (R) result in less metabolic disarray compared to neutral (N) treatments and those leading to synergy or collateral sensitivity (S). Each line with a circle represents the 95% confidence interval of the entropy score for a particular group. Color difference indicates significant differences between intervals (ANOVA,  $p < 0.05$ ).

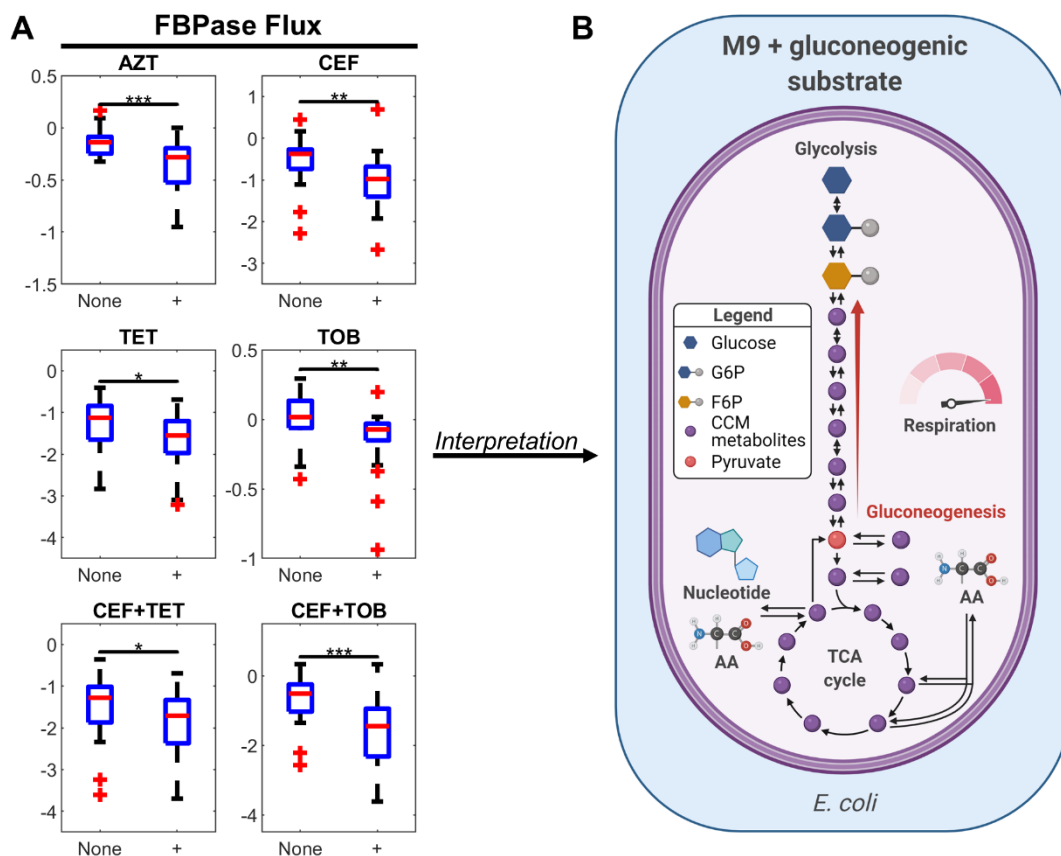

**Fig. 6. The growth environment influences antibiotic treatment potency.** (A) Positive flux through fructose 1,6-bisphosphatase (FBPase) was associated with increased potency for all six drug treatments assessed in the Biolog experiment. (B) Gluconeogenesis is activated during growth in minimal media (M9) supplemented with carbon sources downstream of pyruvate. This leads to increased respiration that enhances antibiotic efficacy compared to carbon sources that are directly converted to glucose, such as sugars. AZT: aztreonam, CEF: cefoxitin, TET: tetracycline, TOB: tobramycin, AUC: area under the curve, TCA: tricarboxylic acid, G6P: glucose 6-phosphate, F6P: fructose 6-phosphate, CCM: central carbon metabolism.

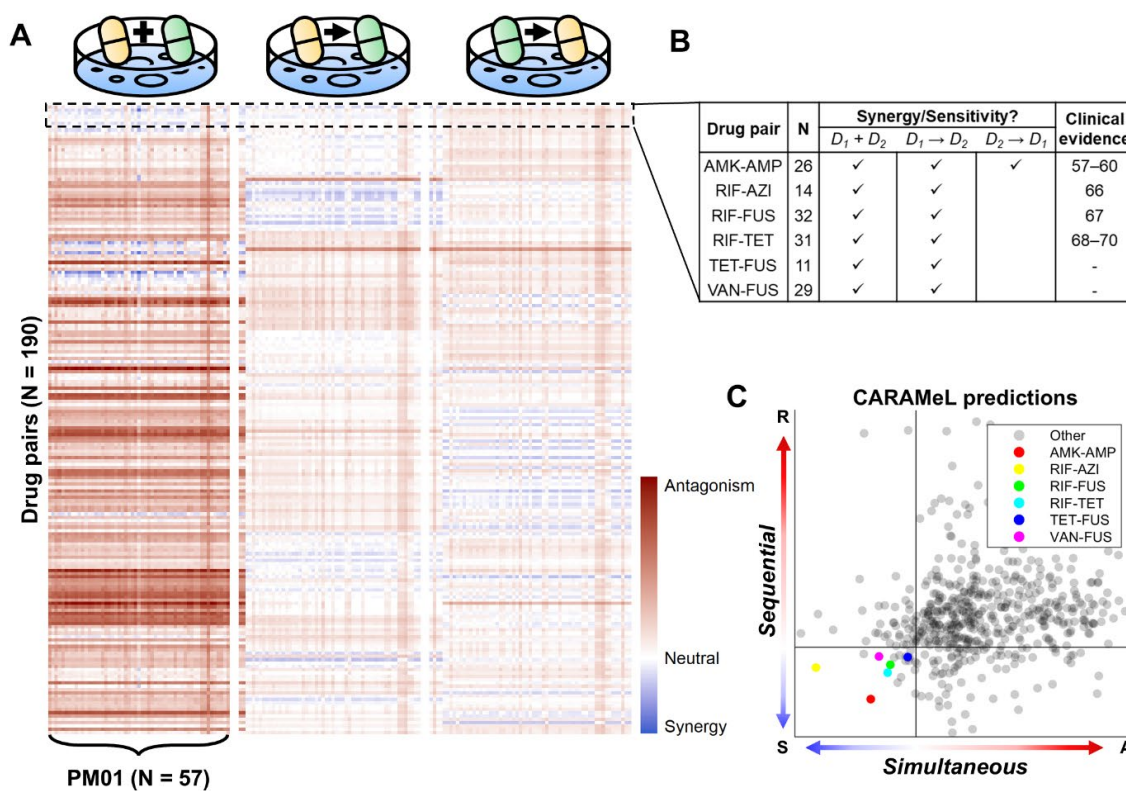

826  
827  
828  
829  
830  
831  
832  
833

**Fig. 7. CARAMeL prediction of pairwise combination therapy landscape.** (A) Out of 528 drug pairs, 190 were predicted to yield synergy ( $IS < 0$ ) for at least one case (i.e., cell). (B) Six of these were predicted to be robustly synergistic across time scales (simultaneous and sequential) and growth conditions ( $N > 10$ ), with four possessing clinical evidence for efficacy. (C) Visual comparison of the lowest predicted interaction scores for simultaneous vs. sequential interactions for all drug pairs that were screened ( $N = 528$ ). AMK: amikacin, AMP: ampicillin, AZI: azithromycin, FUS: fusidic acid, RIF: rifampicin, TET: tetracycline, VAN: vancomycin, N: number of growth conditions yielding synergy, S: synergy, A: antagonism, R: cross-resistance.

834  
835  
836  
837  
838  
839

**Table 1. Metabolic pathways enriched amongst top predictors for the *E. coli* CARAMeL model.** Pathway enrichment was determined based on 652 features explaining 95% of the variance in model predictions. These features mapped to 360 reactions in the *E. coli* GEM iJO1366, out of which 244 had differential flux that significantly distinguished between synergy and antagonism (two-sample t-test,  $p$ -value  $< 0.05$ ). Based on this 244-reaction list, 13 pathways were found to be significantly enriched (hypergeometric test,  $p$ -value  $< 0.05$ ). N = number of reactions in pathway, Ratio =  $N / \text{total reactions in pathway}$ , P-value = hypergeometric test  $p$ -value.

| Pathway                                | N  | Ratio | P-value |
|----------------------------------------|----|-------|---------|
| Pyruvate Metabolism                    | 7  | 0.70  | 2E-07   |
| Nucleotide Salvage Pathway             | 29 | 0.21  | 8E-06   |
| Inorganic Ion Transport and Metabolism | 22 | 0.20  | 2E-04   |
| Oxidative Phosphorylation              | 13 | 0.25  | 2E-04   |
| Pentose Phosphate Pathway              | 5  | 0.42  | 4E-04   |
| Transport, Outer Membrane              | 11 | 0.24  | 8E-04   |
| Citric Acid Cycle                      | 4  | 0.29  | 7E-03   |
| Glycine and Serine Metabolism          | 4  | 0.29  | 7E-03   |
| Alternate Carbon Metabolism            | 26 | 0.13  | 3E-02   |
| Anaplerotic Reactions                  | 2  | 0.25  | 3E-02   |
| Folate Metabolism                      | 2  | 0.22  | 5E-02   |
| Glyoxylate Metabolism                  | 1  | 0.25  | 5E-02   |
| Glycolysis/Gluconeogenesis             | 4  | 0.18  | 5E-02   |

840



## Supplementary Materials for

### **An interpretable flux-based machine learning model of drug interactions across metabolic space and time**

Carolina H. Chung & Sriram Chandrasekaran\*

\*Corresponding author. Email: [csriram@umich.edu](mailto:csriram@umich.edu)

#### **This PDF file includes:**

Figs. S1 to S4  
Tables S1 to S6  
Data S1 to S5

#### **Other Supplementary Materials for this manuscript include the following:**

Data S1 to S5

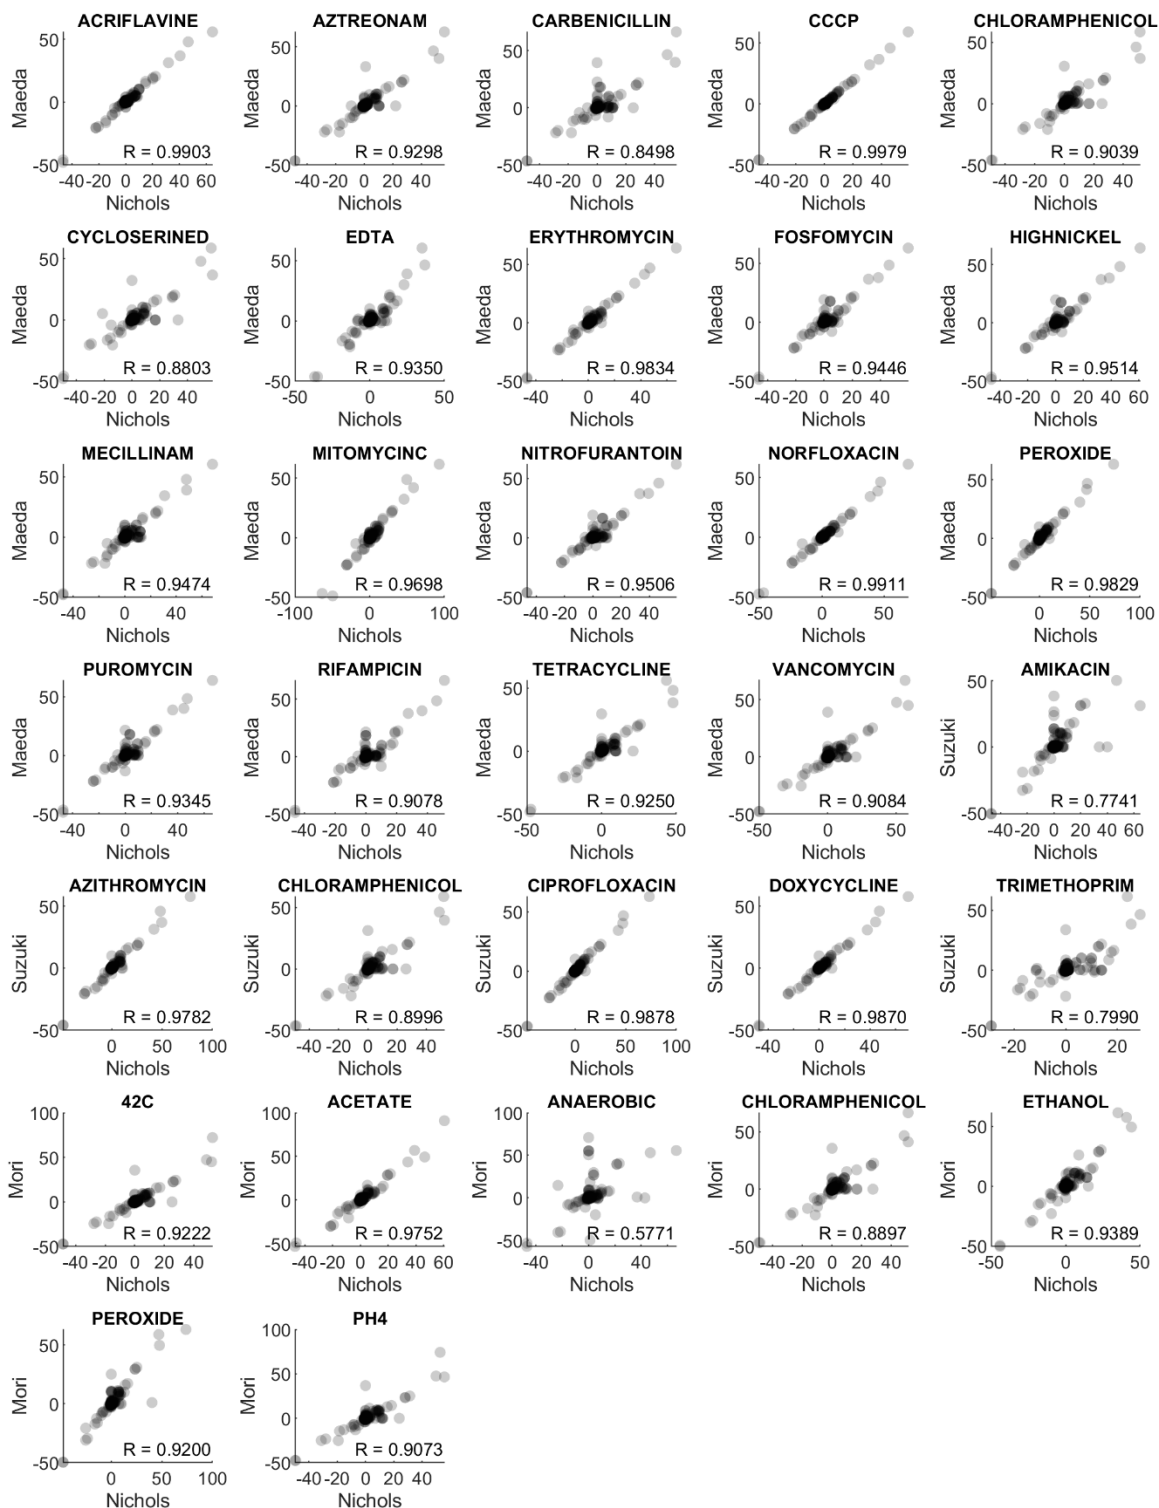

**Fig. S1.**

**Flux profile comparison between different omic-based simulations.** Correlations based on Pearson's method (all yielded  $p \ll 10^{-3}$ ). All plots possess the same number of points (i.e., reactions,  $N = 2583$ ). Nichols: chemogenomic-based (35), Maeda: transcriptomic-based (37), Suzuki: transcriptomic-based (38), Mori: proteomic-based (39).

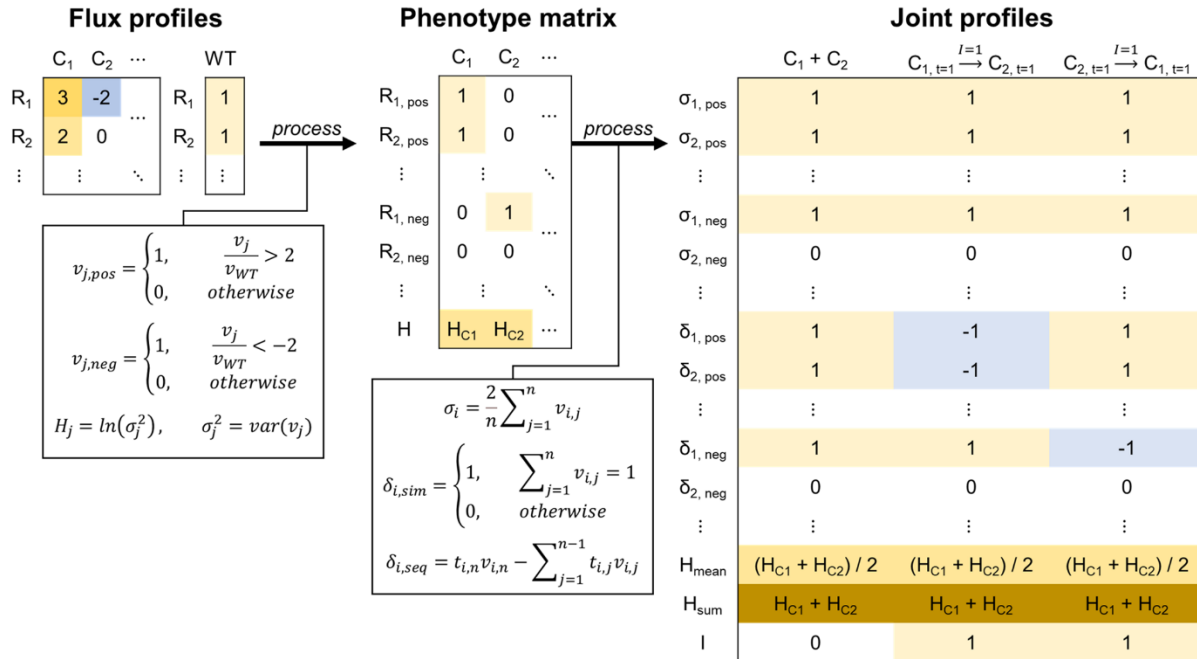

**Fig. S2.**

**Schematic of flux data processing into joint profiles.** Flux data ( $v$ ) simulated from genome-scale metabolic models is binarized according to differential flux (either positive or negative) in comparison to wild type (WT, i.e., reference). These binarized flux profiles, along with the entropy ( $H$ ) calculated for each condition ( $C$ ), define the phenotype matrix which is subsequently processed into joint profiles. The sigma ( $\sigma$ ) definition is the same between simultaneous ( $sim$ ) and sequential ( $seq$ ) interactions, while the delta ( $\delta$ ) definition differs depending on the interaction type.  $R$  = reaction,  $I$  = time interval,  $n$  = number of conditions in a combination.

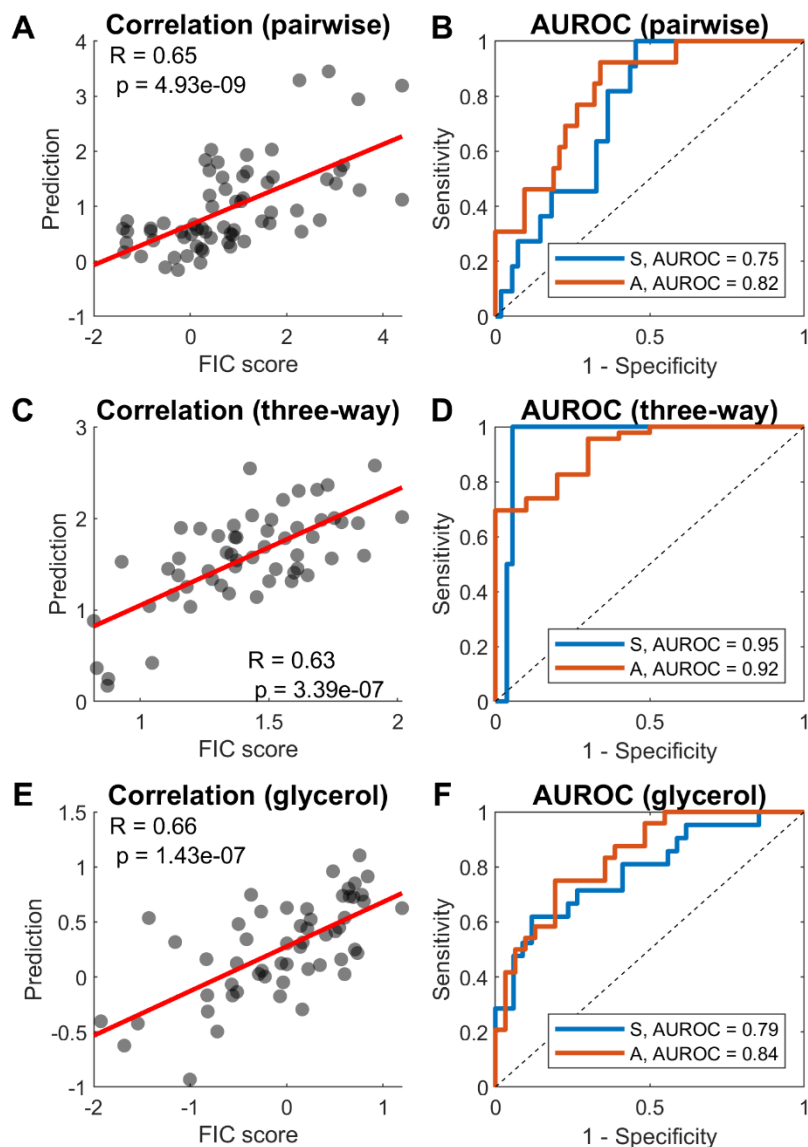

**Fig. S3.**

**CARAMeL results for *E. coli* drug interaction data.** Model performance results visualized as scatter and receiver operating curve (ROC) plots are shown for predicting (A-B) pairwise interactions, (C-D) three-way interactions, and (E-F) pairwise interactions in M9 glycerol. AUROC: area under the receiver operating curve. FIC: fractional inhibitory concentration, S: synergy, A: antagonism.

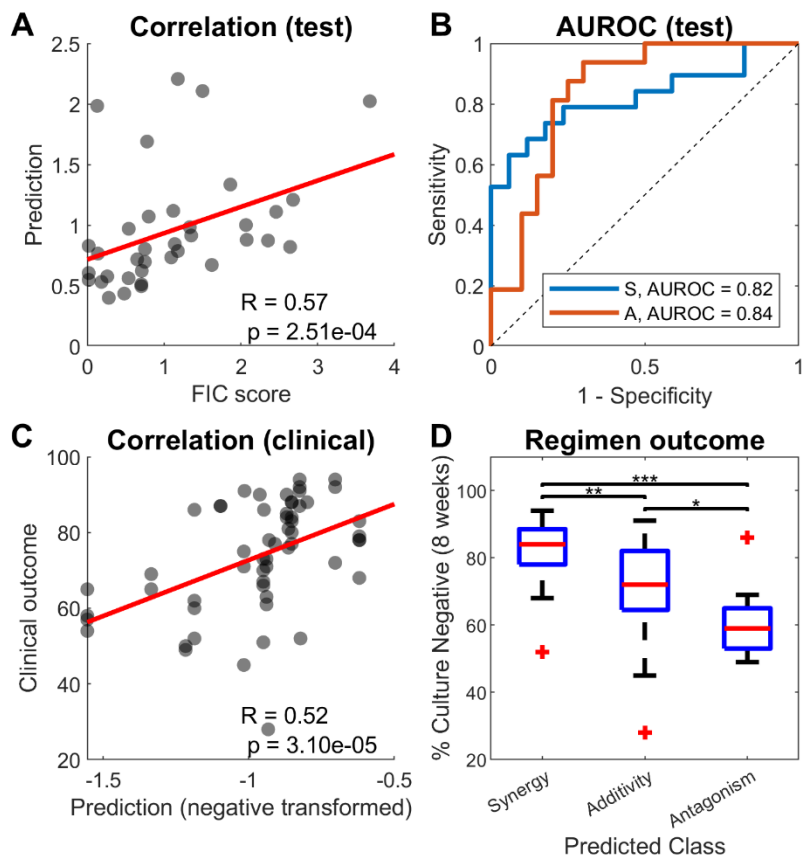

**Fig. S4.**

**CARAMeL results for *M. tb* drug interaction data.** (A-B) Model performance results visualized as scatter and receiver operating curve (ROC) plots are shown for predicting multi-drug interactions measured experimentally. (C) Inverted model predictions for 57 TB regimens prescribed in clinical trials correlate with clinical efficacy. (D) Predictions classified as synergistic capture most of the efficacious treatments (sputum clearance > 80%). AUROC: area under the receiver operating curve, \*\* p-value < 0.01, \*\*\* p-value < 0.001 (unpaired t-test). FIC: fractional inhibitory concentration, AUROC: area under the receiver operating curve, S: synergy, A: antagonism.



**Table S1.****List of antibiotics used in *E. coli* drug interaction datasets.** Abb.: abbreviation.

| Compound          | Abb. | Target                  | Class           | Dataset      |             |           |    |         |          |
|-------------------|------|-------------------------|-----------------|--------------|-------------|-----------|----|---------|----------|
|                   |      |                         |                 | Pair (train) | Pair (test) | Three-way | LB | Glucose | Glycerol |
| Amikacin          | AMK  | Protein synthesis, 30S  | Aminoglycoside  | ✓            | ✓           |           |    |         | ✓        |
| Gentamicin        | GEN  |                         |                 | ✓            | ✓           |           |    |         |          |
| Spectinomycin     | SPE  |                         |                 |              | ✓           |           | ✓  | ✓       | ✓        |
| Tobramycin        | TOB  |                         |                 | ✓            | ✓           |           |    |         |          |
| Minocycline       | MIN  |                         | Tetracycline    |              |             | ✓         |    |         |          |
| Tetracycline      | TET  |                         |                 | ✓            | ✓           |           | ✓  | ✓       | ✓        |
| Azithromycin      | AZI  | Protein synthesis, 50S  | Macrolide       |              |             | ✓         | ✓  | ✓       | ✓        |
| Chlarythromycin   | CLA  |                         |                 | ✓            | ✓           |           |    |         |          |
| Erythromycin      | ERY  |                         |                 | ✓            | ✓           |           |    |         |          |
| Chloramphenicol   | CHL  |                         | Phenylpropanoid | ✓            | ✓           | ✓         | ✓  | ✓       | ✓        |
| Ciprofloxacin     | CIP  | DNA gyrase              | Quinolone       | ✓            | ✓           | ✓         |    |         |          |
| Levofloxacin      | LEV  |                         |                 | ✓            | ✓           |           |    |         |          |
| Nalidixic acid    | NAL  |                         |                 | ✓            | ✓           | ✓         |    |         | ✓        |
| Ampicillin        | AMP  | Cell wall               | Beta-lactam     |              |             | ✓         | ✓  | ✓       | ✓        |
| Aztreonam         | AZT  |                         |                 |              |             |           | ✓  | ✓       | ✓        |
| Cefoxitin         | CEF  |                         |                 | ✓            | ✓           |           |    |         | ✓        |
| Oxacillin         | OXA  |                         |                 | ✓            | ✓           |           |    |         |          |
| Vancomycin        | VAN  |                         | Glycopeptide    |              | ✓           |           |    |         |          |
| Fusidic acid      | FUS  | Elongation factor       | Fusidane        |              | ✓           |           |    |         |          |
| Trimethoprim      | TMP  | Folic acid biosynthesis | Pyrimidine      | ✓            | ✓           |           |    |         |          |
| Rifampicin        | RIF  | RNA synthesis           | Rifampin        |              | ✓           | ✓         | ✓  | ✓       | ✓        |
| Nitrofurantoin    | NIT  | Multiple mechanisms     | Furan           | ✓            | ✓           | ✓         |    |         |          |
| Triclosan         | TRI  |                         | Phenol          |              |             |           | ✓  | ✓       | ✓        |
| Hydrogen peroxide | H22  | Oxidative stress        | Stress          | ✓            | ✓           |           |    |         |          |

**Table S2.**

**List of antibiotics used in *M. tb* drug interaction datasets.** Abb.: abbreviation, PTM: post-translational modification. \* Putative mechanism.

| Compound        | Abb.     | Target                 | Class                  | Dataset     |      |          |  |
|-----------------|----------|------------------------|------------------------|-------------|------|----------|--|
|                 |          |                        |                        | Train       | Test | Clinical |  |
| Sutezolid       | SUTx     | Protein synthesis, 23S | Oxazolidinone          | ✓           |      |          |  |
| Amikacin        | AMK      | Protein synthesis, 30S | Aminoglycoside         | ✓           |      |          |  |
| Kanamycin       | KAN      |                        |                        | ✓           |      |          |  |
| Spectinomycin   | SPE      |                        |                        | ✓           | ✓    |          |  |
| Streptomycin    | SM       |                        | ✓                      | ✓           | ✓    |          |  |
| Minocycline     | MIN      |                        | Tetracycline           | ✓           |      |          |  |
| Tetracycline    | TET      |                        |                        | ✓           |      |          |  |
| Azithromycin    | AZI      |                        | Protein synthesis, 50S | Macrolide   | ✓    |          |  |
| Chlarythromycin | CLA      | ✓                      |                        |             | ✓    |          |  |
| Erythromycin    | ERY      | ✓                      |                        |             |      |          |  |
| Roxithromycin   | ROX      | ✓                      |                        |             |      |          |  |
| Linezolid       | LZDx     | Oxazolidinone          |                        | ✓           |      |          |  |
| Chloramphenicol | CHL      | Phenylpropanoid        |                        | ✓           |      |          |  |
| Ciprofloxacin   | CIP      | DNA gyrase             | Quinolone              | ✓           | ✓    |          |  |
| Levofloxacin    | LEV      |                        |                        | ✓           | ✓    |          |  |
| Moxifloxacin    | MOX      |                        |                        | ✓           | ✓    | ✓        |  |
| Norfloxacin     | NFX      |                        |                        |             | ✓    |          |  |
| Ofloxacin       | OFX1     |                        |                        | ✓           |      | ✓        |  |
| Novobiocin      | NOV      |                        | Glycoside              | ✓           |      |          |  |
| Ampicillin      | AMP      |                        | Cell wall              | Beta-lactam | ✓    |          |  |
| Oxacillin       | OXA      | ✓                      |                        |             |      |          |  |
| Vancomycin      | VAN      | Glycopeptide           |                        | ✓           |      |          |  |
| Cefaclor        | CFL      | Cephalosporin          |                        | ✓           |      |          |  |
| SQ109           | SQ109    | Ethylenediamine        |                        | ✓           |      |          |  |
| Isoniazid*      | INH      | Hydrazine              |                        | ✓           | ✓    | ✓        |  |
| Econazole       | ECO      | Imidazole              |                        | ✓           |      |          |  |
| Pretomanid      | PA824    |                        |                        | ✓           |      | ✓        |  |
| Ethionamide*    | ETH      | Isonicotinic acid      |                        | ✓           |      |          |  |
| Cycloserine D   | CSD      | Serine                 |                        | ✓           |      |          |  |
| PBTZ169         | PBTZ169x | Thiazine               |                        | ✓           |      |          |  |
| Capreomycin     | CAP      | Multiple mechanisms    |                        | Peptide     | ✓    | ✓        |  |
| Clofazimine*    | CFZ      |                        |                        | Phenazine   | ✓    | ✓        |  |
| Fusidic acid    | FUS      | Elongation factor      |                        | Fusidane    | ✓    |          |  |
| Ethambutol      | EMBx     | RNA synthesis          | Ethylenediamine        | ✓           |      | ✓        |  |
| Rifampicin      | RIF      |                        | Rifampin               | ✓           | ✓    | ✓        |  |
| Rifapentine     | RIFP     |                        | Rifamycin              |             |      | ✓        |  |
| Bedaquiline     | BDQ      | ATP synthase           | Diarylquinoline        | ✓           | ✓    |          |  |

|                |      |                     |                |   |   |   |
|----------------|------|---------------------|----------------|---|---|---|
| Ethium bromide | EB   | DNA structure       | Phenanthridine | ✓ |   |   |
| Pyrazinamide*  | PZA  | Fatty acid synthase | Pyrazine       |   |   | ✓ |
| Menadione      | MEN  | PTM                 | Vitamin        | ✓ |   |   |
| Verapamil      | VERx | Calcium channels    | Phenethylamine | ✓ |   |   |
| Thioridazine   | THZ  | Synaptic activity   | Phenothiazine  | ✓ |   |   |
| Chlorpromazine | CPZ  |                     |                | ✓ | ✓ |   |

**Table S3.**

**Drug information for Biolog experiment.** Abb.: abbreviation, Conc.: drug concentration.

| Compound     | Abb. | Target                 | Class          | Type           | Conc. ( $\mu\text{g/mL}$ ) |          |
|--------------|------|------------------------|----------------|----------------|----------------------------|----------|
|              |      |                        |                |                | Single                     | Pairwise |
| Aztreonam    | AZT  | Cell wall              | Beta-lactam    | Bactericidal   | 0.03                       | -        |
| Cefoxitin    | CEF  |                        |                | Bactericidal   | 1.87                       | 1.87     |
| Tetracycline | TET  | Protein synthesis, 30S | Tetracycline   | Bacteriostatic | 1.42                       | 1.42     |
| Tobramycin   | TOB  |                        | Aminoglycoside | Bactericidal   | 0.15                       | 0.15     |

**Table S4.**

**List of antibiotics used in sequential drug interaction datasets for *E. coli*.** Abb.: abbreviation.

| Compound           | Abb. | Target                  | Class           | Time scale |          |          |
|--------------------|------|-------------------------|-----------------|------------|----------|----------|
|                    |      |                         |                 | $T = 10$   | $T = 21$ | $T = 90$ |
| Amikacin           | AMK  | Protein synthesis, 30S  | Aminoglycoside  | ✓          | ✓        | ✓        |
| Gentamicin         | GEN  |                         |                 | ✓          |          | ✓        |
| Spectinomycin      | SPE  |                         |                 |            | ✓        |          |
| Streptomycin       | SM   |                         |                 | ✓          | ✓        | ✓        |
| Tobramycin         | TOB  |                         |                 |            | ✓        |          |
| Doxycycline        | DOX  |                         | Tetracycline    |            | ✓        | ✓        |
| Minocycline        | MIN  |                         |                 | ✓          |          | ✓        |
| Tetracycline       | TET  |                         |                 | ✓          | ✓        | ✓        |
| Azithromycin       | AZI  |                         |                 | ✓          |          | ✓        |
| Erythromycin       | ERY  | Protein synthesis, 50S  | Macrolide       |            | ✓        |          |
| Spiramycin         | SPI  |                         |                 |            | ✓        |          |
| Chloramphenicol    | CHL  |                         | Phenylpropanoid | ✓          | ✓        | ✓        |
| Ciprofloxacin      | CIP  | DNA gyrase              | Quinolone       | ✓          | ✓        | ✓        |
| Levofloxacin       | LEV  |                         |                 | ✓          |          | ✓        |
| Nalidixic acid     | NAL  |                         |                 | ✓          | ✓        | ✓        |
| Norfloxacin        | NOR  |                         |                 |            |          | ✓        |
| Ampicillin         | AMP  | Cell wall               | Beta-lactam     | ✓          | ✓        |          |
| Cefoxitin          | CEF  |                         |                 |            | ✓        |          |
| Ceftazidime        | CFZ  |                         |                 |            |          | ✓        |
| Amoxicillin        | AMX  |                         |                 | ✓          |          |          |
| Sulfamonomethoxine | SMM  | Folic acid biosynthesis | Sulfonamide     |            | ✓        |          |
| Trimethoprim       | TMP  |                         | Pyrimidine      | ✓          | ✓        | ✓        |
| Nitrofurantoin     | NIT  | Multiple mechanisms     | Furan           | ✓          | ✓        |          |
| Fosfomicin         | FOS  | Cell wall biogenesis    | Phosphonic acid | ✓          |          |          |
| Fusidic acid       | FUS  | Elongation factor       | Fusidane        |            | ✓        |          |
| Polymyxin B        | PMB  | Lipopolysaccharide      | Peptide         | ✓          |          |          |
| Rifampicin         | RIF  | RNA synthesis           | Rifampin        | ✓          |          | ✓        |



**Table S5.**

**Constraint-based modeling (CBM) parameter optimization results.** \* Chosen parameters for *M. tb*, + chosen parameters for *E. coli*. CV-R: 10-fold cross-validation correlation in the training dataset, GR-V: variance in growth rate, NG-P: percentage of no growth (GR = 0) conditions.

| CBM parameters |             |                | <i>E. coli</i> results |               |               | <i>M. tb</i> results |               |               |
|----------------|-------------|----------------|------------------------|---------------|---------------|----------------------|---------------|---------------|
| <i>Kappa</i>   | <i>Rho</i>  | <i>Epsilon</i> | <i>CV-R</i>            | <i>GR-V</i>   | <i>NG-P</i>   | <i>CV-R</i>          | <i>GR-V</i>   | <i>NG-P</i>   |
| 0.001          | 0.001       | 0.001          | 0.4055                 | 0             | 0             | 0.3640               | 0             | 0             |
| 0.01           | 0.01        | 0.001          | 0.3260                 | 0.0074        | 0             | 0.5024               | 0.0003        | 0.0233        |
| 0.1            | 0.1         | 0.001          | 0.4077                 | 0.0634        | 0             | 0.4858               | 0.0005        | 0.0698        |
| 1              | 1           | 0.001          | 0.4313                 | 0.2022        | 0.3636        | 0.4409               | 0.0005        | 0.0698        |
|                | 0.001       | 0.001          | 0.4260                 | 0             | 0             | 0.4124               | 0             | 0             |
| *              | <b>0.01</b> | <b>0.01</b>    | 0.3739                 | 0.0091        | 0             | <b>0.5207</b>        | <b>0.0003</b> | <b>0.1395</b> |
|                | 0.1         | 0.01           | 0.389                  | 0.0670        | 0             | 0.5149               | 0.0004        | 0.6977        |
|                | 1           | 0.01           | 0.4189                 | 0.1866        | 0.4848        | 0.5242               | 0.0003        | 0.7674        |
|                | 0.001       | 0.001          | 0.1                    | 0.6406        | 0             | 0.5231               | 0             | 0             |
|                | 0.01        | 0.01           | 0.1                    | 0.4090        | 0.0095        | 0                    | 0.4959        | 0.0001        |
|                | 0.1         | 0.1            | 0.1                    | 0.3978        | 0.1056        | 0.0606               | 0.4792        | 0.0001        |
|                | 1           | 1              | 0.1                    | 0.3869        | 0.1294        | 0.5152               | 0.4471        | 0.0001        |
|                | 0.001       | 0.001          | 1                      | 0.3860        | 0             | 0                    | 0.4620        | 0             |
| +              | <b>0.01</b> | <b>0.01</b>    | <b>1</b>               | <b>0.6512</b> | <b>0.0113</b> | <b>0</b>             | 0.5131        | 0.0003        |
|                | 0.1         | 0.1            | 1                      | 0.6150        | 0.0994        | 0.0909               | 0.5270        | 0             |
|                | 1           | 1              | 1                      | 0.6294        | 0.0765        | 0.5758               | 0.5099        | 0             |

**Table S6.**

**Benchmarking correlation results based on different constraint-based modeling (CBM) parameter choices.** \* Chosen parameters for *M. tb*, + chosen parameters for *E. coli*. R1: pairwise interactions (27), R2: three-way interactions (28), R3: glycerol interactions (28), R4: pairwise and three-way interactions (29), R5: pairwise to five-way TB clinical regimens (40).

| CBM parameters |             |                | <i>E. coli</i> results |               |               | <i>M. tb</i> results |               |               |
|----------------|-------------|----------------|------------------------|---------------|---------------|----------------------|---------------|---------------|
| <i>Kappa</i>   | <i>Rho</i>  | <i>Epsilon</i> | <i>R1</i>              | <i>R2</i>     | <i>R3</i>     | <i>R4</i>            | <i>R5</i>     |               |
| 0.001          | 0.001       | 0.001          | 0.2884                 | 0.4441        | 0.5781        | 0.6370               | 0.5535        |               |
| 0.01           | 0.01        | 0.001          | 0.5032                 | 0.3516        | 0.5092        | 0.5873               | 0.4369        |               |
| 0.1            | 0.1         | 0.001          | 0.4676                 | 0.3666        | 0.5715        | 0.4946               | 0.2304        |               |
| 1              | 1           | 0.001          | 0.5115                 | 0.4001        | 0.5421        | 0.4717               | 0.4135        |               |
| *              | 0.001       | 0.001          | 0.01                   | 0.3726        | 0.3636        | 0.5544               | 0.4638        | 0.5361        |
|                | <b>0.01</b> | <b>0.01</b>    | <b>0.01</b>            | 0.4525        | 0.2447        | 0.5900               | <b>0.5256</b> | <b>0.5445</b> |
|                | 0.1         | 0.1            | 0.01                   | 0.5390        | 0.2599        | 0.5514               | 0.4858        | 0.2642        |
|                | 1           | 1              | 0.01                   | 0.3899        | 0.3460        | 0.5915               | 0.4730        | 0.4124        |
|                | 0.001       | 0.001          | 0.1                    | 0.5421        | 0.5809        | 0.5669               | 0.5382        | 0.4483        |
|                | 0.01        | 0.01           | 0.1                    | 0.5829        | 0.5023        | 0.6281               | 0.6335        | 0.4263        |
|                | 0.1         | 0.1            | 0.1                    | 0.3313        | 0.3762        | 0.6382               | 0.5942        | 0.5140        |
|                | 1           | 1              | 0.1                    | 0.1545        | 0.4375        | 0.6745               | 0.5560        | 0.4982        |
| +              | 0.001       | 0.001          | 1                      | 0.1772        | 0.1372        | 0.2668               | 0.3253        | 0.5380        |
|                | <b>0.01</b> | <b>0.01</b>    | <b>1</b>               | <b>0.6445</b> | <b>0.6216</b> | <b>0.6641</b>        | 0.4884        | 0.4870        |
|                | 0.1         | 0.1            | 1                      | 0.6057        | 0.6536        | 0.6650               | 0.4947        | 0.4788        |
|                | 1           | 1              | 1                      | 0.6352        | 0.6169        | 0.6101               | 0.4939        | 0.3726        |

**Data S1. (separate file)**

Top CARAMeL features explaining 95% of the variance in model predictions.

**Data S2. (separate file)**

iJO1366 reactions explaining 95% of the variance between actual and predicted interaction outcomes.

**Data S3. (separate file)**

Carbon sources in Biolog PM01 plate for which flux data was simulated.

**Data S4. (separate file)**

CARAMeL predictions for 30,096 drug-drug-media interactions in three time scales (N = 90,288).

**Data S5. (separate file)**

Drug combinations predicted to yield synergy or collateral sensitivity in at least one metabolic condition. N = number of conditions where both synergy and collateral sensitivity were predicted.
